1           **A Novel SARS-CoV-2 Multitope Protein/Peptide Vaccine Candidate is Highly**  
2           **Immunogenic and Prevents Lung Infection in an AAV hACE2 Mouse Model and**  
3           **non-human primates**

4 Farshad Guirakhoo, PhD<sup>1\*</sup>, Lucy Kuo, MS<sup>2</sup>, James Peng, PhD<sup>2</sup>, Juin-Hua Huang, PhD<sup>2</sup>,  
5 Be-Shen Kuo, PhD<sup>3</sup>, Feng Lin, MD<sup>4</sup>, Yaw-Jen Liu, PhD<sup>3</sup>, Zhi Liu, PhD<sup>4</sup>, Grace Wu, PhD<sup>2</sup>,  
6 Shuang Ding, PhD<sup>4</sup>, Kou-Liang Hou, PhD<sup>2</sup>, Jennifer Cheng, MS<sup>2</sup>, Vicky Yang, MS<sup>2</sup>,  
7 Hank Jiang, MS<sup>2</sup>, Jason Wang, DVM/MS<sup>2</sup>, Tony Chen, DVM<sup>2</sup>, WeiGuo Xia, MS<sup>4</sup>, Ed Lin,  
8 PhD<sup>4</sup>, Chung Ho Hung, PhD<sup>4</sup>, Hui-Jung Chen, MS<sup>3</sup>, Zhonghao Shih, PhD<sup>3</sup>, Yi-Ling Lin,  
9 PhD<sup>5</sup>, Shixia Wang, PhD<sup>1</sup>, Valorie Ryan, PhD<sup>1</sup>, Brandon T. Schurter, PhD, JD<sup>4</sup>, Mei Mei  
10 Hu, JD<sup>1,3,4</sup>, Gray Heppner, MD<sup>1</sup>, Delphine C. Malherbe, PhD<sup>6,7</sup>, Alexander Bukreyev,  
11 PhD<sup>6,7,8</sup>, Michael Hellerstein, PhD<sup>1</sup>, Thomas P. Monath, MD<sup>1</sup>, Chang Yi Wang, PhD<sup>2,3,4</sup>

12

13 <sup>1</sup> Vaxxinity Inc, Dallas, TX, USA, <sup>2</sup> United Biomedical Inc Asia, Taipei, Taiwan,  
14 <sup>3</sup> United BioPharma, HuKo, Hsin Chu, Taiwan, <sup>4</sup> United Biomedical Inc, Hauppauge, NY,  
15 USA, <sup>5</sup> Academia Sinica, Nangang, Taipei, Taiwan, <sup>6</sup> Department of Pathology, University  
16 of Texas Medical Branch, Galveston, TX, USA, <sup>7</sup> Galveston National Laboratory,  
17 Galveston, TX, USA, <sup>8</sup> Department of Microbiology & Immunology, University of Texas  
18 Medical Branch, Galveston, TX, USA

19 \* Corresponding author

20 Email: [farshad@vaxxinity.com](mailto:farshad@vaxxinity.com)

21

22 Short title: SARS-CoV-2 multitope protein/peptide vaccine induced protection

23 Keywords: SARS-CoV-2, COVID-19, Vaccine, RBD, peptide, antibody, neutralizing  
24 antibody, T cell, protection, non-human primate

## 25 **Abstract**

26 A novel multipeptide protein-peptide vaccine against Severe Acute Respiratory Syndrome  
27 Coronavirus 2 (SARS-CoV-2) infection and disease is described in this report. The initial  
28 development and characterization experiments are presented along with proof-of-concept  
29 studies for the vaccine candidate UB-612. UB-612 consists of eight components rationally  
30 designed for induction of potentially neutralizing antibodies and broad T cell responses  
31 against SARS-CoV-2: the S1-RBD-sFc fusion protein, six synthetic peptides (one  
32 universal peptide and five SARS-CoV-2-derived peptides), a proprietary CpG TLR-9  
33 agonist at low concentration as an excipient, and aluminum phosphate adjuvant. Through  
34 immunogenicity studies in Guinea pigs and rats, we optimized the design of  
35 protein/peptide immunogens and selected an adjuvant system, yielding a vaccine that  
36 provides excellent S1-RBD binding and high neutralizing antibody responses, robust  
37 cellular responses, and a Th1-oriented response at low doses. In challenge studies, UB-  
38 612 vaccination reduced viral load and prevented development of disease in mouse and  
39 non-human primate challenge models. With a Phase 1 trial completed, a Phase 2 trial  
40 ongoing in Taiwan, and additional trials planned to support global authorizations, UB-612  
41 is a highly promising and differentiated vaccine candidate for prevention of SARS-CoV-2  
42 infection and COVID-19 disease.

## 43 **Author Summary**

44 SARS-CoV-2 virus, the causative agent of Coronavirus Disease 2019 (COVID-19), has  
45 spread globally since its origin in 2019, causing an unprecedented public health crisis that  
46 has resulted in greater than 4.7 million deaths worldwide. Many vaccines are under  
47 development to limit disease spread and reduce the number of cases, but additional  
48 candidates that promote a robust immune response are needed. Here, we describe a  
49 multipeptide protein-peptide vaccine platform that is unique among COVID-19 vaccines. The  
50 advantages of our approach are induction of both high levels of neutralizing antibodies as  
51 well as a Th/CTL response in the vaccinated host, which mimics the immune response  
52 that occurs after natural infection with SARS-CoV-2. We demonstrate that our vaccine is  
53 immunogenic and effective in preventing disease in several animal models, including AAV-  
54 hACE-2 transduced mice, and both rhesus and cynomolgus macaques. Importantly, no  
55 immunopathology was observed in the lungs of immunized animals, therefore showing  
56 that antibody-dependent enhancement (ADE) does not occur. Our study provides an  
57 additional, novel vaccine candidate for advancement in clinical trials to treat and prevent  
58 SARS-CoV-2 infection and COVID-19 disease.

## 59 Introduction

60 A novel coronavirus, Severe Acute Respiratory Syndrome Coronavirus 2 (SARS-  
61 CoV-2) was identified as the causative agent of a cluster of cases of the new coronavirus  
62 disease 2019 (COVID-19), in Wuhan China, in December 2019 [1]. SARS-CoV-2 has  
63 caused over 229 million cases of COVID-19 and greater than 4.7 million deaths worldwide  
64 as of September 21, 2021 [2]. In response to this unprecedented public health crisis, many  
65 vaccine platforms are under development, including inactivated virus, recombinant  
66 adenovirus-based vectors, recombinant proteins, and nucleic acid approaches. This paper  
67 describes a novel multipeptide protein-peptide vaccine candidate. The UB-612 vaccine is  
68 unique in that it has been developed specifically to address the need for a vaccine that  
69 elicits a strong, neutralizing antibody response targeting the receptor binding domain  
70 (RBD) of the Spike protein while simultaneously stimulating T cell responses to conserved  
71 peptides derived from three structural proteins: S2 subunit of Spike, Membrane (M) and  
72 Nucleocapsid (N) of the virus. UB-612 elicits high levels of neutralizing antibodies in  
73 addition to a Th1 prone immune response. Unlike some other full-length S protein- based  
74 vaccines, the RBD-focused antibody responses induced for UB-612 vaccine can avoid  
75 any potential antibody-dependent enhancement (ADE) in the lungs [3,4].

76 The S1-RBD is a critical component of SARS-CoV-2, as it is required for cell  
77 attachment and represents the principal neutralizing domain of the virus [5-7]. Use of this  
78 truncated portion of the S protein as the vaccine antigen could provide a margin of safety  
79 not achievable with the full-length S protein and thereby eliminating the possibility of  
80 potentially deadly side effects that have previously been shown in animal models with  
81 SARS-CoV and MERS as well as with an inactivated RSV vaccine resulting in its  
82 withdrawal from the market [4,8-11]. Therefore, we chose to investigate S1-RBD as a

83 potential immunogen for our novel UB-612 vaccine, and ultimately identified S1-RBD-sFc  
84 as the primary immunogen for induction of neutralizing antibodies and a memory B cell  
85 response. S1-RBD-sFc is a recombinant protein made through fusion of S1-RBD of  
86 SARS-CoV-2 to a single chain fragment crystallizable region (sFc) of a human IgG1.  
87 Genetic fusion of a vaccine antigen to a Fc fragment has been successfully shown to  
88 promote antibody induction and neutralizing activity, for example against HIV gp120 in  
89 Rhesus macaques or Epstein Barr virus gp350 in BALB/c mice [12-13]. Moreover,  
90 engineered Fc has been used in many therapeutic antibodies as a solution to minimize  
91 non-specific binding, increase solubility, yield, thermostability, and *in vivo* half-life [14].  
92 Furthermore, the Fc-tagged RBD allows purification with Protein A, Protein G or Protein L  
93 affinity columns, yielding a high quality and low-cost purified product.

94         The durability of the antibody response after SARS-CoV-2 infection is unknown,  
95 with several studies demonstrating variable lengths of persistence for neutralizing  
96 antibody titers. One study found that the IgG response to S protein declined rapidly in  
97 >90% of SARS-CoV-2 infected individuals within 2-3 months [15,16]. Additionally, a  
98 neutralizing response against the S protein alone is unlikely to provide lasting protection  
99 against SARS-CoV-2 and its emerging variants with mutated B-cell epitopes [17].  
100 However, other studies have shown relatively stable antibody titers for up to 3-4 months  
101 after SARS-CoV-2 infection [18,19]. Memory T cells to SARS-CoV-1 were also shown to  
102 persist 11-17 years after the original SARS outbreak in 2003 [20,21]. Because the vast  
103 majority of reported CD8+ T cell epitopes in SARS-CoV-2 proteins are located in the  
104 ORF1ab, N, M, and ORF3a regions [22], while only three are present in the S protein, we  
105 included Th/CTL epitopes from highly conserved sequences derived from all three  
106 proteins (S, nucleocapsid, N and membrane, M) of SARS-CoV-2 [23-30] in the design of  
107 our UB-612 vaccine.

108           To enhance the immune response of the antigen portion (S1-RBD-sFc), we added  
109 our proprietary peptide UBITH®1a to the Th/CTL peptide mixture. UBITH®1a is a  
110 proprietary synthetic peptide with an original framework sequence derived from the  
111 measles virus fusion protein (MVF) modified to allow accommodation of multiple MHC  
112 class II binding motifs. In previous studies, attachment of UBITH®1a to a target “functional  
113 B epitope peptide” derived from a self-protein rendered the self-peptide immunogenic,  
114 thus breaking immune tolerance [31]. Proprietary CpG oligonucleotide (CpG1) [32] at low  
115 concentration is included as excipient to bring the rationally designed immunogens  
116 together through “charge neutralization” to stabilize the Th and CTL peptides by dipolar  
117 interactions between the negatively charged CpG1 molecule and positively charged  
118 peptides. In addition, activation of TLR-9 signaling by CpG is known to promote IgA  
119 production and favor the Th1 immune response [33]. The UBITH®1a peptide is  
120 incorporated as one of the Th peptides for its “epitope cluster” nature to further enhance  
121 the antiviral activity of the SARS-CoV-2 derived Th and CTL epitope peptides

122           UB-612 includes, in addition to the recombinant S1-RBD-sFc fusion protein, CTL  
123 and Th epitope peptides selected from immunodominant S2, M and N regions known to  
124 bind to human MHC I and II molecules. Most reactivity to Spike protein comes from CD4+  
125 T cells, and there is only one reported dominant CD8+ T cell epitope in the S protein,  
126 which resides within the RBD [22]. The smaller M and N structural proteins are recognized  
127 by T cells of patients who successfully controlled their infection [22,29]. The five Th and  
128 CTL epitope peptides are selected from sequences of S2, M and N proteins of SARS-  
129 CoV-2, while the UBITH®1a is a proprietary T helper peptide adapted from measles virus  
130 fusion (MVF) protein. This results in balanced B cells (induction of neutralizing antibodies)  
131 and Th/CTL responses in a vaccinated host. This mixture of S1-RBD-sFc and Th/CTL

132 peptides is designed to elicit T cell activation, memory B cell recall and effector functions  
133 similar to those elicited after natural SARS-CoV-2 infection.

134 Finally, to further improve the immune response, UB-612 is formulated with an  
135 aluminum phosphate (Adju-Phos®) adjuvant, which promotes Th2 responses via the  
136 nucleotide binding oligomerization domain (NOD) like receptor protein 3 (NLRP3)  
137 inflammasome pathway. Additionally, it has pro-phagocytic and repository effects with a  
138 long record of safety and the ability to improve immune responses to target proteins in  
139 many vaccine formulations [34,35].

140 In this paper, we describe selection of the S1-RBD-sFc protein from among three  
141 candidates with different Fc-fusion structures. Guinea pigs (GP) were vaccinated with one  
142 of the three constructs transiently expressed in CHO cells. The lead candidate was  
143 chosen, based on highest neutralization and S1:ACE2:binding inhibition titers, and was  
144 further formulated with Th/CTL peptides (UB-612) [36]. We then confirmed  
145 immunogenicity and efficacy in AAV-hACE-2 transduced mice, as well as rhesus and  
146 cynomolgus macaques.

147

## 148 **Results**

### 149 **Construction and characterization of S1-RBD-sFc**

150       The UB-612 vaccine immunogen was designed to contain an S1-RBD-sFc fusion  
151 protein plus five synthetic Th/CTL peptides for class I and II MHC molecules derived from  
152 SARS-CoV-2 S2, M, and N proteins. To identify the best RBD immunogen to induce  
153 neutralizing antibody responses, three S1-RBD-based protein antigen (sequences aa340-  
154 539) vaccine candidates were designed: S1-RBD-sFc (single chain Fc), S1-RBDa-sFc  
155 (RBD domain modified to reduce a Cys-disulfide bond for better domain folding), and S1-  
156 RBD-Fc (double chain Fc) (structure of S1-RBD-sFc illustrated in **Fig 1B**). These synthetic  
157 genes were transfected into Chinese Hamster Ovary (CHO) cells for transient expression  
158 of proteins for initial studies. The immunogenicity of each vaccine candidate was tested in  
159 GPs, to select the lead B cell immunogen candidate.

160       After *in vivo* identification of S1-RBD-sFc as the lead candidate, a stable cell line  
161 was generated through transfection of CHO cells followed by dihydrofolate reductase  
162 (DHFR) amplification. See methods section for full details of S1-RBD-sFc protein  
163 expression and purification.

### 164 **Modification of human IgG Fc portion**

165       To reduce reactogenicity of S1-RBD-sFc, we modified the human IgG Fc portion  
166 of the protein. S1-RBD-sFc consists of the RBD linked with a human IgG1 sFc at the C-  
167 terminus (**Fig 1A**). The RBD domain functions as a high-affinity ligand for human  
168 Angiotensin-Converting Enzyme 2 (hACE2) cell receptors [37]. In this vaccine candidate,  
169 the IgG1 sFc domain was engineered to contain a series of mutations (C220S, C226S,  
170 C229S, and N297H), to eliminate the disulfide bonds and N-glycan, respectively (**Fig 1B**).



171 The mutation of N297 of the deimmunized heavy chain to H was to remove its  
172 glycosylation motif to prevent the depletion of target hACE2 through effector functions.  
173 S1-RBD-sFc was found to bind hACE2 well via ELISA (**Fig 1C**).

## 174 **Immunogenicity Study in Guinea Pigs to Down-Select S1-** 175 **RBD-based-protein Design**

176 The goal of the guinea pig (GP) immunogenicity study was to down select a single  
177 protein construct for use as the vaccine candidate. Three groups of GPs (N=5/group) were  
178 vaccinated at 0 and 3 weeks post initial immunization (WPI) intramuscularly (IM) with one  
179 of three S1-RBD-based protein immunogens formulated with ISA50 V2 adjuvant (**Fig 2A**).  
180 Sera were drawn at three time points (0, 3, and 5 WPI), and tested for immunogenicity  
181 through measurement of binding antibodies (BAbs) by ELISA. Inhibition of SARS-CoV-2  
182 binding to hACE2 by RBD-Fc-elicited antibodies was investigated using ELISA and a cell-  
183 based assay.

184 In the ELISA, recombinant SARS-CoV-2 spike protein S1 antigen was coated onto  
185 plates, and individual sera were tested for binding antibody titers to the coating antigen.  
186 As shown in **Fig 2A**, all constructs elicited a binding antibody response to SARS-CoV-2  
187 S1 RBD protein in sera collected at 3- or 5-weeks post initial immunization (WPI). Of the  
188 three constructs tested, S1-RBD-sFc induced the highest immune response, with a  
189 geometric mean titer (GMT) nearly 5 log<sub>10</sub> at 3 WPI and 6 log<sub>10</sub> at 5 WPI. The difference  
190 between S1-RBD-sFc and S1-RBDa-sFc at 5 WPI was statistically significant ( $p \leq 0.05$ ),  
191 indicating that all constructs were highly immunogenic with S1-RBD-sFc holding an  
192 advantage in terms of binding antibody responses. For the S1:ACE2 binding inhibition  
193 activity evaluation, recombinant ACE2-ECD-sFc was immobilized onto plates.  
194 Individual serum was pre-incubated with His-tagged S1 protein (tracer) and then

195 transferred into ACE2-ECD-sFc coated plates to test its inhibition activity. Although  
196 the mean ID<sub>50</sub> inhibition values were not statistically significant ( $p \geq 0.05$ ), with the highest  
197 ID<sub>50</sub> values observed for antibodies raised by S1-RBD-sFc (7251.5), followed by S1-RBD-  
198 Fc (3019.8) and S1-RBDa-sFc (1950.8). This result indicates that all antigens elicited  
199 antibodies capable of inhibiting hACE2 binding, with S1-RBD-sFc raising the most potent  
200 responses.

201 The function of anti-RBD antibodies was quantified both as inhibition of RBD  
202 binding to hACE2 and as neutralization of live SARS-CoV-2. In the hACE2 binding  
203 inhibition cell-based assay, HEK293 cells expressing hACE2 were treated with mixtures  
204 of pooled GP sera and S1-protein (Fc tagged), then assayed by flow cytometry (FACS)  
205 by staining cells with fluorescently labeled anti-human IgG Fc protein antibody. The GMT  
206 ID<sub>50</sub> (the inhibitory dilutions at which 50% neutralization is attained) values were 1026 for  
207 S1-RBD-sFc, 193 for S1-RBDa-sFc, and 325 for S1-RBD-Fc vaccine, again showing  
208 functional activity for antibodies elicited by all candidates, still the highest activity was seen  
209 for S1-RBD-sFc. Results are provided in **Figs 2C, S1 and S2**, respectively. To test  
210 neutralizing capacity of the elicited antibodies, live virus cytopathic effect (CPE) 50%  
211 reduction assay were adopted, using the anti-SARS-CoV-2 N protein antibody and  
212 immunofluorescent visualization for neutralization titer (VNT<sub>100</sub>) determination (**Fig 2D and**  
213 **Fig S2**). Sera from S1-RBD-sFc demonstrated superior activity, with neutralization titers  
214 at 5 WPI 2-4-fold higher than those from the other two groups, protecting 50% of the cells  
215 from viral infection at titers of 504-1,024 at 3 WPI and >32768 in pooled guinea pig sera  
216 at 5 WPI (**Fig S2**).

217 In a separate experiment, we compared neutralizing titers in sera from GPs  
218 vaccinated with S1-RBD-sFc with convalescent sera of COVID-19 patients, using the S1-  
219 RBD:ACE2 binding inhibition ELISA (also termed as qNeu ELISA). The results, given in

220 **Fig S2**, demonstrated that GP immune sera diluted 1,000-fold (3 WPI) or 8,000-fold (5  
221 WPI) exhibited comparable or higher inhibition of S1-RBD:ACE2 binding than by the  
222 convalescent sera of 10 patients diluted at 20-fold, illustrating that the sera of GPs  
223 contained  $\geq 50$ -fold higher antibody titers than human convalescent sera.

## 224 **Immunogenicity Studies in Rats**

225 The initial immunogenicity assessment in GPs established the superior humoral  
226 immunogenicity of S1-RBD-sFc as the B cell component of our vaccine against SARS-  
227 CoV2. The GP experiments were tested with three protein candidates with a fixed dosing  
228 regimen (200  $\mu\text{g}$  prime, 100  $\mu\text{g}$  boost, ISA 50 adjuvant), allowing for a rigorous comparison  
229 of the respective candidate constructs. In the second set of experiments in Sprague-  
230 Dawley rats, the immunogen doses and adjuvants were varied to allow selection of an  
231 optimal adjuvant (**Fig 3A**). S1-RBD-sFc was formulated with five Th/CTL peptides  
232 selected from S2, M and N proteins of SARS-CoV-2 and our proprietary universal Th  
233 peptide (UBI $\text{Th}^{\text{®}}$ 1a) [32] to generate the multipeptide protein-peptide vaccine candidate (**Fig**  
234 **1A**). We then combined the candidate vaccine with one of two different adjuvant systems:  
235 ISA51/CpG3 or Adju-Phos $\text{®}$ /CpG1. These vaccine-adjuvant combinations were  
236 administered to rats IM on Week 0 (prime) and 2 (boost) with a wide dose range of 10 to  
237 100  $\mu\text{g}$  per injection. The animals were bled at baseline (day 0), 2 weeks., after 1st dose),  
238 3 and 4 weeks (i.e., 1 and 2 weeks after the 2<sup>nd</sup> dose) for antibody titer analyses.

239 Vaccines formulated with either adjuvant system elicited similar levels of anti S1-  
240 RBD ELISA titers across all doses ranging from 10 to 100  $\mu\text{g}$ , indicative of an excellent  
241 immunogenicity of the vaccine formulations even with low quantities of the primary protein  
242 immunogen (**Fig 3B**). In the S1-RBD:ACE2 binding inhibition ELISA, low doses of 10 and  
243 30  $\mu\text{g}$  induced inhibitory activity equivalent to the higher doses of 100  $\mu\text{g}$  at Week 4. The

244 most potent inhibitory activity was seen with the lowest dose of S1-RBD-sFc protein (10  
245 µg) formulated with peptides and the Adju-Phos® adjuvant. In the replicating virus  
246 neutralization assay against the Taiwanese SARS-CoV-2 isolate (representative of the  
247 original Wuhan sequence), the Week 4 immune sera induced by UB-612 vaccine did not  
248 show a significant dose-dependent effect in rats (**Fig 3C**). The low doses of adjuvanted  
249 protein, 10 and 30 µg, could neutralize viral infection at VNT<sub>50</sub> of >10,240 dilution.

250 The rat immune sera at Week 6 (i.e. 4 weeks after the 2<sup>nd</sup> immunization) from each  
251 vaccinated dose group were assayed two ways: first, in comparison with a set of  
252 convalescent sera of COVID-19 patients for titers in S1-RBD:ACE2 binding inhibition  
253 ELISA, expressed in blocking level of µg/mL; and second, through a SARS-CoV-2 CPE  
254 assay in Vero-E6 cells, expressed as VNT<sub>50</sub>. As shown in **Fig 3D**, all doses of the vaccine  
255 formulations elicited neutralizing titers in rats that were significantly higher than those in  
256 convalescent patients by S1-RBD:ACE2 binding ELISA and higher (but not achieving  
257 statistical significance due to variation in patient data and low number of animals) by  
258 VNT<sub>50</sub>.

259 To assess the Th1/Th2 response, vaccinated rats were evaluated using ELISpot.  
260 Rats were dosed at Weeks 0 and 2 with 30 µg or 100 µg of UB-612 vaccine. Splenocytes  
261 were then collected at Week 4 and restimulated *in vitro* with the Th/CTL peptide pool plus  
262 S1-RBD or with the Th/CTL peptide pool alone. High levels of IFN-γ and IL-2 secretion  
263 was observed in splenocytes after the stimulations with Th/CTL peptide pool plus S1-RBD  
264 or with the Th/CTL peptide pool alone, while only minor amounts of IL-4 were seen (**Figs**  
265 **4A and 4B**). The individual peptide stimulations also demonstrated that the rat  
266 splenocytes also produced high levels of IFN-γ and IL-2 (Th1) responses but very low  
267 levels of IL-4 (Th2) against S2 peptides (p5752, p5753 and p5755) (**Fig 4S-A, B and C**);  
268 N peptide (p5754) (**Fig 4S-D**); panel E: M peptide (p5815) (**Fig 4S-E**). The results indicate

269 that UB-612 is highly immunogenic and induces a Th1-prone cellular immune response,  
270 as shown by the high ratios of IFN- $\gamma$ /IL-4 or IL-2/IL-4 [39].

## 271 **Protective immunity in AAV-hACE2 transduced mice**

272 The initial challenge study of UB-612 was performed in the adeno-associated virus  
273 (AAV)/hACE2 transduced BALB/c mouse model. Groups of 3 BALB/C mice were  
274 vaccinated at Weeks 0 and 2 with UB-612 containing 3, 9 or 30  $\mu$ g of protein and  
275 formulated with Adju-Phos®. S1-RBD-specific antibody titers were evaluated at Weeks 0,  
276 3 and 4. After 2 doses of vaccine, S1-RBD specific antibody responses were detected in  
277 all three dose groups with significant dose dependent response pattern (**Fig 5B**),  $p < 0.05$   
278 between 3 and 9  $\mu$ g groups and  $p < 0.005$  between 3 and 30  $\mu$ g groups. The mice were  
279 infected with adeno-associated virus (AAV) expressing hACE2 at 4 WPI and challenged  
280 2 weeks later with  $10^6$  TCID<sub>50</sub> of SARS-CoV-2 by the intranasal (IN) route (**Fig 5A**).  
281 Efficacy of the vaccine was measured using lung viral loads and body weight  
282 measurements. As shown in **Fig 5C**, vaccination with 30  $\mu$ g of UB-612 significantly  
283 reduced lung viral loads ( $\sim 3.5$  log<sub>10</sub> viral genome copies/ $\mu$ g RNA or  $\sim 5$ -fold TCID<sub>50</sub>/mL of  
284 infectious virus) compared to the saline group ( $p < 0.05$ , paired t-test). As shown in **Fig 5D**,  
285 vaccination with middle (9  $\mu$ g) and high (30  $\mu$ g) doses resulted in a reduction in lung  
286 pathology. There was no evidence even in the suboptimal (3  $\mu$ g) dose group of  
287 enhancement of lung pathology (**Fig 5F**). The lung pathological scores shown in **Fig 5E**  
288 demonstrated that the high dose (30  $\mu$ g) group had significant pathological score reduction  
289 compared to the saline group,  $p < 0.05$ . Vaccination with 3 or 9  $\mu$ g of UB-612 reduced  
290 live virus detection by cell culture method (TCID<sub>50</sub>) to below the level of detection (LOD)  
291 but did not appear to reduce viral loads significantly when measured by RT-PCR. In sum,  
292 despite the lack of statistical power (N=3 mice) in this study, it appears that the highest

293 dose of 30 µg could have maximum protective efficacy as demonstrated by the absence  
294 of live virus, inflammatory cell infiltration, and immunopathology in the lungs.

## 295 **Immunogenicity and challenge studies in rhesus and** 296 **cynomolgus macaques**

297         Based on an established model using rhesus macaques (RM) [37,38], an  
298 immunization study of UB-612 by IM injection was initiated with RM (N = 4/group) receiving  
299 0, 10, 30 or 100 µg of UB-612 at 0 and 4 weeks in the first NHP study (Study 1) (**Fig 6A**).  
300 IgG binding antibody to S1-RBD was increased over baseline in all animals, with titers  
301 reaching around 3 logs at 5 and 7 weeks (**Fig 6B**). Strong neutralizing antibody responses  
302 were induced, with highest titers observed at the 30 µg dose (**Fig 6C**). In ELISpot antigen-  
303 specific IFN-γ-secreting T cells were elicited in a dose-dependent manner (**Fig 6D**), with  
304 highest responses at the 100 µg dose level. To test the response to boosting, the 3<sup>rd</sup>  
305 immunization was given at Day 70 (6 weeks after the 2<sup>nd</sup> immunization). One week after  
306 the 3<sup>rd</sup> dose, S1-specific IgG titers were significantly boosted (~5-fold) at all three dose  
307 levels (**Fig 7A**). Neutralizing antibody responses against the Wuhan strain also increased  
308 in a live virus CPE assay one week after the 3<sup>rd</sup> dose, with the greatest increase (5~10-  
309 fold) seen for the 100 µg dose level (**Fig 7B**). We also measured neutralization in a  
310 pseudovirus assay expressing the Spike proteins from the Wuhan strain and 5 variants of  
311 concern (VOC: B.1.1.7, P.1, B.1.429, B.1.526 and B.1.351) on Days 42 and 70 after initial  
312 immunization and one week after the 3<sup>rd</sup> dose. Serum collected one week post third dose  
313 had increased neutralization activity against all five VOC (**Fig 7C**). In a live virus assay,  
314 sera taken one week after the 3<sup>rd</sup> dose (Day 77) demonstrated potent neutralization  
315 responses against the D614G strain and four variants of concern. (**Fig 7D**). The  
316 neutralizing activities against Wuhan (wild-type, WT), D614G, as well as Variant of

317 Concerns (VOCs) B.1.1.7, P.1, B.1.429 and B.1.617 V2 were very similar while the  
318 neutralizing activities were reduced against B.1.526, B.1.351 by >50% compared to WT  
319 or D614G strains (**Fig 7D and 7E**). Animals were challenged on Day 77 with SARS-CoV-  
320 2 (strain and dose). Reduced nasal shedding and lung segment viral loads were  
321 significantly reduced (**Fig 7C**). There was no evidence for enhancement of lung pathology

322 In a second NHP study, cynomolgus macaques received either saline, UB-612 30  
323 µg or UB-612 100 µg on Day 0 and Day 28 and were challenged intratracheally (IT) with  
324  $1 \times 10^5$  TCID<sub>50</sub> SARS-CoV-2 virus (Wuhan strain) on Day 55 (**Fig 8A**). The results showed  
325 that high titers of neutralizing antibody titers were achieved against live virus Wuhan strain  
326 on Day 50 (3 weeks after the 2<sup>nd</sup> immunization for both the 30 µg and 100 µg doses of  
327 UB-612) (**Fig 8B**) and also against the B.1.617.2 Delta variant (**Fig 8C**), though a drop in  
328 titer of 2-fold for the 30 µg dose and 1.5-fold for the 100 µg dose was seen for Delta as  
329 compared to the Wuhan strain. When viral loads were measured in the bronchoalveolar  
330 lavage (BAL), nasal swabs, and rectal swabs through subgenomic RNA RT-PCR, the 100  
331 µg dose group was associated with the highest protective immunity (**Figs 8D-8F**).

332

## 333 Discussion

334 Successful vaccines against many viral diseases including COVID-19, protect  
335 through eliciting neutralizing antibody responses. However, although neutralizing  
336 antibodies may fully protect at titers present weeks after the initial primary vaccination,  
337 protection may wane over time. Under this circumstance, clonally expanded populations  
338 of antigen-specific lymphocytes may be important for maintaining protection. Falling  
339 neutralizing titers also raise the possibility of antibody-dependent enhancement (ADE) or  
340 concerns over Vaccine Associated Enhanced Respiratory Disease (VAERD) by SARS-  
341 CoV-2 [9,39,40]. UB-612 was developed specifically to address the need for a vaccine  
342 that elicits a strong, but ADE-free neutralizing response while also eliciting robust and  
343 long-lasting T cell responses. The ADE-free neutralizing response was accomplished by  
344 avoiding amino acid residues 597-603, located in the S2 subunit, which have been  
345 implicated in ADE of SARS-CoV *in vitro* and in NHPs [8].

346 Initially, we developed three RBD-sFc fusion protein vaccine candidates, which  
347 were then down-selected to a single candidate through immunogenicity tests in GPs,  
348 showing robust S1-RBD binding antibody responses and functional activity, including  
349 neutralization of live SARS-CoV-2 and inhibition of s1:hACE2 binding. Of the three  
350 candidates tested, S1-RBD-sFc (S1-RBD fused to a single-chain Fc) gave the strongest  
351 responses in all measurements. S1-RBD-sFc was slightly more immunogenic than the  
352 other two constructs in S1-RBD binding antibody assays, but the strength of the S1-RBD-  
353 sFc immunogen became abundantly clear when functional activity of elicited antibodies  
354 was tested. Functional activity was quantified both as inhibition of viral binding to hACE2  
355 and as neutralization of live SARS-CoV-2. In both tests, all antigens elicited functional  
356 antibodies, with S1-RBD-sFc raising the most potent responses. Based on these results,



357 the S1-RBD-sFc protein was selected as the lead candidate for the B cell component of  
358 the vaccine.

359 Further confirmation of the immunogenicity of this vaccine candidate was obtained  
360 by comparison of neutralizing titers in sera from S1-RBD-sFc-immunized GPs with titers  
361 in convalescent sera from COVID-19 patients. The results demonstrated that highly diluted  
362 GP immune sera (e.g. 1:1000 after one dose or 1:8000 after two doses) exhibited  
363 comparable or higher inhibition of S1-RBD:ACE2 binding than convalescent sera of 10  
364 patients diluted 20-fold. This finding is of clinical significance since it suggests that an S1-  
365 RBD-sFc-based vaccine can elicit sufficient neutralizing antibodies to prevent SARS-CoV-  
366 2 infection.

367 S1-RBD-sFc was then combined with rationally designed Th/CTL peptides,  
368 derived from S2, M and N structural proteins of SARS-CoV-2, to generate the final  
369 unadjuvanted vaccine candidate, which was studied in Sprague Dawley rats to compare  
370 two adjuvant combinations (ISA 51VG/CpG3 and Adju-Phos®/CpG1).

371 In the initial rat study, which tested the two vaccine-adjuvant combinations at a  
372 dose range of 10 to 300 µg per injection, our results indicated that vaccines formulated  
373 with both adjuvant systems elicited similar BAb titers across all doses, indicating excellent  
374 immunogenicity of the vaccine even for low quantities of the primary protein immunogen.  
375 As in the earlier GP studies, however, functional antibody assays demonstrated clear  
376 differences between candidate vaccine formulations. These tests showed the equivalency  
377 in immunogenicity between the two adjuvant combinations while confirming excellent  
378 immunogenicity at low doses. We chose Adju-Phos®/CpG1 as the adjuvant in our final  
379 vaccine formulation due to its long safety record and ability to improve immune responses.  
380 Neutralization results indicated that even low doses of adjuvanted protein (10 and 30 µg)

381 showed excellent neutralizing immunogenicity. All doses of protein elicited neutralizing  
382 titers significantly higher than those in convalescent patients, as determined through an  
383 S1-RBD:ACE2 binding ELISA. Additionally, titers were higher (but not achieving statistical  
384 significance due to the spread in patient data and the low number of animals) by VNT<sub>50</sub>.

385 A Th1-oriented immune response against SARS-CoV-2 is potentially important to  
386 avoid ADE or VAERD, as demonstrated by studies with SARS and MERS coronaviruses  
387 as well as a commercial formalin inactivated RSV vaccine (inducing a Th2-biased  
388 response), which led to the death of several vaccinated children who were later exposed  
389 to live RSV [9,41,42]. Therefore, the FDA has recommended that any vaccines for COVID-  
390 19 provide data of a Th1-biased immune response in animals before proceeding to First  
391 in Human (FIH) trials [43]. To address this issue, T cell immunity was assessed in rats  
392 upon restimulation of splenocytes harvested from vaccinated animals with the respective  
393 B and T cell vaccine components. Our results indicate that UB-612 vaccination can induce  
394 a robust Th1-prone cellular immune response, likely due to presence of CpG1 [44], even  
395 under the influence of a Th2-biased alum-containing adjuvant system [45].

396 We used an AAV/hACE2 transduced BALB/c mouse model developed by Dr. Tao,  
397 Mi-Hua at Academia Sinica in Taiwan [46] to demonstrate protective efficacy of UB-612 *in*  
398 *vivo*. Wild-type mice are not a suitable host for SARS-CoV-2; however, mice expressing  
399 hACE2 are susceptible to infection and disease from SARS-CoV-2 [47]. In this mouse  
400 model, productive infection with SARS-CoV-2 leads to high viral loads in the lungs and  
401 weight loss, which can be used together with other clinical symptoms to assess safety,  
402 (e.g., lack of ADE or VAERD) and efficacy of vaccine candidates including UB-612. We  
403 infected mice with AAV-expressing hACE2 at 4 WPI and challenged 2 weeks later with  
404 SARS-CoV-2 via the intranasal (IN) route. Our results demonstrate that UB-612 can

405 reduce lung viral load and weight loss without induction of VAERD or immunopathology in  
406 the lungs in a dose-dependent manner.

407 In addition, we tested UB-612 in rhesus and cynomolgus macaque models. While  
408 SARS-CoV-2 does not cause a lethal COVID-19-like disease in monkeys, the virus can  
409 cause infection and illness. In these animals, disease is generally mild, self-limiting and  
410 resolves within 2 weeks [48-50]. In an initial study, rhesus macaques received three  
411 vaccinations at three dose levels. All vaccinated animals developed high titers of S1-RBD  
412 binding antibodies that were also potently neutralizing. In a second study, cynomolgus  
413 macaques were immunized with 2 IM administration of either 30 or 100 ug of UB-612 and  
414 challenged via the intratracheal and intranasal routes. All immunized animals  
415 demonstrated strong immune responses and were protected against challenge.

416 In summary, we have developed and demonstrated proof of concept for UB-612,  
417 a novel multipeptide protein-peptide vaccine being rapidly advanced in clinical trials for  
418 prevention of SARS-CoV-2 infection and COVID-19. We showed that our vaccine elicited  
419 high levels of neutralizing antibodies and a Th1-prone immune response that protected  
420 animals challenged with a high dose of SARS-CoV-2, without induction of  
421 immunopathology in the lungs.

422

423

## 424 **Materials and Methods**

### 425 **Vaccine Design and Production**

#### 426 **Design of UB-612 Vaccine Immunogen**

427         The UB-612 vaccine immunogen was designed to contain an S1-RBD-sFc fusion  
428 protein plus five synthetic Th/CTL peptides for class I and II MHC molecules derived from  
429 SARS-CoV-2 S2, M, and N proteins. For Th/CTL epitope design, we employed the  
430 “Epitope Prediction and Analysis Tools” (<http://tools.iedb.org/population>) to identify the  
431 desirable CTL T cell epitopes. Th/CTL epitopes from highly conserved sequences  
432 derived from all three SARS-CoV-2 proteins (S, N and M) proteins were identified through  
433 an extensive literature search and epitope analysis [22,29]. Five peptides within these  
434 regions were selected for inclusion in the UB-612 immunogen and subject to further  
435 designs. Each selected peptide contained Th or CTL epitopes with prior validation of MHC  
436 I or II binding [51] and exhibited good manufacturability characteristics (optimal length and  
437 amenability for high quality synthesis). These rationally designed Th/CTL peptides were  
438 further modified by addition of a Lys-Lys-Lys tail to each respective peptide’s N-terminus  
439 to improve peptide solubility and enrich positive charge for use in vaccine formulation [32].  
440 UBITH®1a, a proprietary synthetic peptide with an original framework sequence derived  
441 from the measles virus fusion protein (MVF) was added to S1-RBD-sFc to enhance the  
442 immune response. Aluminum phosphate (Adju-Phos®, InvivoGen) adjuvant was also  
443 added to further promote Th2 responses. These components were mixed with CpG1,  
444 which binds the positively (designed) charged peptides by dipolar interactions and also  
445 serves as an adjuvant. All peptides and CpG1 were produced synthetically.

## 446 **Vaccine Construction and Preparation**

447 S1-RBD-sFc protein contains 431 amino acid residues with 12 cysteine residues  
448 (Cys6, Cys31, Cys49, Cys61, Cys102, Cys150, Cys158, Cys195, Cys246, Cys306,  
449 Cys352 and Cys410), forming 6 pairs of disulfide bonds (Cys6-Cys31, Cys49-Cys102,  
450 Cys61-Cys195, Cys150-Cys158, Cys246-Cys306 and Cys352-Cys410). The molecular  
451 mass of S1-RBD-sFc protein is about 50 kDa. To construct the vector expressing the  
452 recombinant fusion protein, the cDNA sequence encoding the S1-RBD-sFc protein (**Fig**  
453 **1B**) was synthesized, digested, and then ligated into Freedom® pCHO 1.0 vector (Life  
454 Technology) to obtain the pCHO S1-RBD-sFc expression vector. The cDNA sequence  
455 was confirmed by DNA sequencing. The S1-RBD-sFc protein was expressed in transient  
456 transfections of CHO cells for GP and rat immunogenicity studies. Three forms of cDNA  
457 fragments for S1-RBD-sFc, S1-RBDa-sFc and S1-RBD-Fc fusion proteins were designed  
458 for transient expression in ExpiCHO-S system for target protein production. The cell  
459 culture was harvested 12–14 days post-transfection, clarified by centrifugation and 0.22-  
460 µm filtration, and purified by protein A chromatography. The purity of the fusion proteins  
461 was determined on SDS gel, and protein concentration was determined according to the  
462 optical density (OD) of UV absorbance at a wavelength of 280 nm. To formulate S1-RBD-  
463 based protein vaccines at 200 µg/mL, equal volumes of the immunogen (S1-RBD sFc,  
464 S1-RBDa-sFc or S1-RBD-Fc) in aqueous phase at 400 µg/mL and sterile water-in-oil  
465 adjuvant Montanide™ ISA50 V2 (Seppic) were mixed using two syringes attached to a  
466 3-way Stopcock and emulsified until no phase separation was seen. The emulsified  
467 vaccines were stored at 4°C before use.

## 468 **Generation of stable cell line for S1-RBD-sFc and confirmation** 469 **of binding activity**

470 A stable high-expressing clone was isolated, and a cell bank was produced using  
471 standard stable CHO methods. S1-RBD-sFc was produced in a suspension culture,  
472 purified by multi-step column chromatography and characterized. Peptide mapping, N-  
473 and C-terminal amino acid sequencing, and analysis of disulfide bonding and glycosylation  
474 confirmed that the expressed and purified protein conformed to the predicted  
475 characteristics. Size-exclusion chromatography (SEC), analytical ultracentrifugation, and  
476 capillary electrophoresis with sodium dodecyl sulfate (CE-SDS) experiments  
477 demonstrated that S1-RBD-Fc exists in two major isoforms, S1-RBD-sFc1 and S1-RBD-  
478 sFc2, corresponding to N-linked and O-linked glycoforms of the protein. The binding  
479 activity of the vaccine was tested in an hACE2 ELISA and was demonstrated to bind  
480 hACE2 with an EC<sub>50</sub> of 8.477 ng/mL, indicative of high affinity.

## 481 **Animal Procedures for Immunogenicity Studies**

### 482 **Immunogenicity studies in Guinea pigs**

483 Male Hartley GPs (200-250 gm/BW) at 8-10 weeks of age were obtained from  
484 National Laboratory Animal Center (NLAC), Taiwan, and maintained in the laboratory  
485 animal center of UBIA. All procedures on animals were performed in accordance with the  
486 regulations and guidelines approved by the Institutional Animal Care and Use Committee  
487 (IACUC) at UBIA Asia. The GPs were vaccinated intramuscularly at weeks 0 and 3 with  
488 Montanide™ ISA50 V2-adjuvanted S1-RBD-based proteins. The animals received the  
489 primary dose of 200 µg of the vaccine (four injection sites, 0.25 mL/site) at week 0 and  
490 were boosted with 100 µg of the vaccine (two injection sites, 0.25 mL/site) at week 3. The

491 immune sera from GPs (n = 5 for each protein immunogen) were collected at weeks 0, 3,  
492 and 5.

### 493 **Adjuvant selection in rats**

494 A total of 24 male Sprague Dawley rats at 8-10 weeks of age (300-350 gm/BW)  
495 were purchased from BioLASCO Taiwan Co., Ltd. After a 3-day acclimation, animals were  
496 randomly assigned to 8 groups. All procedures on animals were performed in accordance  
497 with the regulations and guidelines reviewed and approved by the IACUC at UBIAAsia. The  
498 rats were vaccinated intramuscularly at weeks 0 (prime) and 2 (boost) with different doses  
499 ranging from 10 to 300 µg of UB-612 formulated in Montanide™ ISA 51 VG/CpG3 or Adju-  
500 Phos®/CpG1 adjuvant. The immune sera from rats (n = 3 for each dose group) were  
501 collected at weeks 0, 2, 3, and 4 for assessment of antigenic and functional activities.  
502 Local irritation analysis was conducted via a modified Draize technique [52] once daily  
503 within 24, 48 and 72 hrs after each vaccination. Additional abnormal clinical observations  
504 or lesions such as lameness, abscesses, necrosis, or local inflammation were recorded.

## 505 **Rat Th1/Th2 balance study**

506 A total of 12 male Sprague Dawley rats at 8-10 weeks of age (300-350 gm/BW)  
507 were purchased from BioLASCO Taiwan Co., Ltd. After a 3-day acclimation, animals were  
508 randomly assigned to 4 groups. All procedures on animals were performed in accordance  
509 with the regulations and guidelines reviewed and approved by the IACUC at UBIAsia. The  
510 rats were vaccinated intramuscularly at weeks 0 (prime) and 2 (boost) with three different  
511 doses (10 µg, 30 µg and 100 µg) of UB-612 formulated in Adju-Phos®/CpG1 adjuvant.  
512 The immune sera from rats (n = 3 for each dose group) were collected at weeks 0, 2, 3,  
513 and 4 for assessment of antigenic activities.

## 514 **Vaccination and challenge procedure in AAV6/CB-hACE2 mice**

515 A total of 12 male BALB/C at 8-10 weeks of age were purchased from BioLASCO  
516 Taiwan Co., Ltd. After a 3-day acclimation, animals were randomly assigned to 4 groups.  
517 All procedures on animals were performed in accordance with the regulations and  
518 guidelines reviewed and approved by the IACUC at UBI Asia. The mice were vaccinated  
519 by IM route at weeks 0 (prime) and 2 (boost) with 3, 9, or 30 µg of UB-612 formulated in  
520 Adju-Phos®/CpG1 adjuvant. The immune sera from mice were collected at weeks 0, 3  
521 and 4 for assessment of immunogenic and functional activities by the assay methods  
522 described below.

523 AAV6/CB-hACE2 were produced by the AAV core facility in Academia Sinica  
524 (Taipei, Taiwan). BALB/C mice aged 8-10 weeks were anaesthetized by intraperitoneal  
525 injection of a mixture of Atropine (0.4 mg/ml)/Ketamine (20 mg/ml)/Xylazine (0.4%). The  
526 mice were then intratracheally (IT) injected with  $3 \times 10^{11}$  vg of AAV6/hACE2 in 100 µL  
527 saline. To transduce extrapulmonary organs,  $1 \times 10^{12}$  vg of AAV9/hACE2 in 100 µL saline  
528 was intraperitoneally injected into the mice.



529 Two weeks after AAV6/CB-hACE2 and AAV9/CB-hACE2 transduction, the mice  
530 were anesthetized and intranasally challenged with  $10^6$  PFU TCID<sub>50</sub> of SARS-CoV-2 virus  
531 (hCoV-19/Taiwan/4/2020 TCDC#4 obtained from National Taiwan University, Taipei,  
532 Taiwan) in a volume of 100  $\mu$ L. Mice were weighed after the SARS-CoV-2 challenge daily.  
533 The mouse challenge experiments were evaluated and approved by the IACUC of  
534 Academia Sinica. Surviving mice were humanely euthanized in accordance with ISCIII  
535 IACUC guidelines.

### 536 **Immunogenicity and protection studies in NHPs**

537 Two non-human primate studies were conducted to evaluate the vaccination doses  
538 and numbers of immunizations, and the protective immunity against SARS-CoV-2 virus.  
539 All animal studies were approved by Institutional Animal Care and Use Committees  
540 (IACUC).

541 Animals were housed individually in stainless steel cages, an environmentally  
542 monitored, and well-ventilated room (conventional grade) maintained at a temperature of  
543 18-26°C and a relative humidity of 40-70%. Animals were quarantined and acclimatized  
544 for at least 14 days. The general health of the animals was evaluated and recorded by a  
545 veterinarian within three days upon arrival. Detailed clinical observations, body weight,  
546 body temperature, electrocardiogram (ECG), hematology, coagulation and clinical  
547 chemistry were performed on the NHPs. The data were reviewed by a veterinarian before  
548 being transferred from the holding colony. Based on pre-experimental body weights  
549 obtained on Day -1, all animals were randomly assigned to respective dose groups using  
550 a computer-generated randomization procedure. All animals in Groups 1 to 4 were given  
551 either control or test article via intramuscular (IM) injection. Doses were administered to  
552 the quadriceps by injection of one hind limb. NHPs were observed at least twice daily (AM

553 and PM) during the study periods for clinical signs which included, but were not limited to  
554 mortality, morbidity, feces, emesis, and changes in water and food intake. Animals were  
555 bled at regular intervals for the immunogenicity studies described below.

556 The first NHP study was conducted at JOINN Laboratories (Beijing) in Rhesus  
557 macaques aged approximately 3-6 years. Rhesus macaques were divided into four groups  
558 and injected intramuscularly with high dose (100 µg/dose), medium dose (30 µg/dose), or  
559 low dose (10 µg/dose) of vaccine or physiological saline. All grouped animals were  
560 immunized first at two time points (days 0, 28), and received a third boost dose at day 70.  
561 Blood samples were collected on days 0, 14, 28, 35, 42, 70 and 77 post-immunization.  
562 The macaques were challenged at 11 days after the 3<sup>rd</sup> immunization (Day 81) with SARS-  
563 CoV-2 (10<sup>6</sup> TCID<sub>50</sub>) intratracheally. The viral loads were determined by viral RNA  
564 copies/gram of lung tissue at 7 days after challenge (Day 88).

565 The second NHP study was conducted in cynomolgus macaques (3-6 years old).  
566 At Biomere animals were divided into three groups (5/group) and injected intramuscularly  
567 with high dose (100 µg/dose) or medium dose (30 µg/dose) of vaccine or physiological  
568 saline. All grouped animals were immunized at two time points (days 0, 28). At BIOQUAL  
569 blood samples were collected on days 0, 14, 28, 50 post-immunization. Four weeks after  
570 receipt of the final dose animals were challenged with a total of 1.0 × 10<sup>5</sup> 50% tissue  
571 culture infectious dose (TCID<sub>50</sub>) of SARS-CoV-2 divided equally between intranasal (IN,  
572 0.5 × 10<sup>5</sup>) and intratracheal (IT, 0.5 × 10<sup>5</sup>) administration. On days 0, 3, 5, and 8 post-  
573 challenge, bronchoalveolar lavage (BAL), nasal swabs and rectal swabs and were  
574 collected and viral load was assessed via RT-PCR.

## 575 **Immunoassay**

### 576 **ELISA for quantification of serum anti-S1-RBD antibody**

577           Microtiter 96-well ELISA plates were coated with 2 µg/mL UBP Recombinant S1-  
578 RBD-His protein antigen (100 µL/well in coating buffer, 0.1 M sodium carbonate, pH 9.6)  
579 and incubated overnight (16 to 18 hrs) at 4°C. One hundred µL/well of serially diluted  
580 serum samples (10-fold diluted from 1:100 to 1:100,000, total of 4 dilutions) in 2 replicates  
581 were added and plates were incubated at 37°C for 1 hr. The plates were washed six times  
582 with 200 µL Wash Buffer (solution of phosphate buffered saline, pH 7.0-7.4 with 0.05%  
583 Tween 20 as surfactant). Bound antibodies were detected with standardized preparation  
584 of HRP-rProtein A/G (1:101 of Horseradish peroxidase-conjugated rProtein A/G dissolved  
585 in HRP-stabilizer) at 37°C for 30 min, followed by six washes with Wash Buffer. Finally,  
586 100 µL of TMB (3,3',5,5'-tetramethylbenzidine) prepared in Substrate Working Solution  
587 (citrate buffer containing hydrogen peroxide) was added into each well and incubated at  
588 37°C for 15 min in the dark, and the reaction was stopped by adding 100 µL/well of Stop  
589 Solution (sulfuric acid solution, H<sub>2</sub>SO<sub>4</sub>, 1.0 M). The absorbance at 450 nm was measured  
590 with an ELISA plate reader (Molecular Device, Model: SpectraMax M2e). The UBI® ELISA  
591 Titer Calculation Program was used to calculate the relative titer. The anti-S1-RBD  
592 antibody level was expressed as log<sub>10</sub> of an end point dilution for a test sample (SoftMax  
593 Pro 6.5, Quadratic fitting curve, Cut-off value 0.5).

### 594 **ELISA for binding inhibition of S1-RBD and human ACE2**

595           96-well ELISA plates were coated with 2 µg/mL ACE2-ECD-Fc antigen (100  
596 µL/well in coating buffer, 0.1M sodium carbonate, pH 9.6) and incubated overnight (16 to  
597 18 hrs) at 4°C. The plates were washed 6x with Wash Buffer (25-fold solution of phosphate  
598 buffered saline, pH 7.0-7.4 with 0.05% Tween 20 (250 µL/well/wash) using an Automatic

599 Microplate Washer. Extra binding sites were blocked by 200  $\mu$ L/well of blocking solution  
600 (5 N HCl, Sucrose, Triton X-100, Casein, and Trizma Base). Two-fold serial dilutions (from  
601 1:20 to 1:12,800) of immune serum or a positive control (diluted in a buffered salt solution  
602 containing carrier proteins and preservatives) were mixed with 1:100 dilution of S1-RBD-  
603 HRP conjugate (horseradish peroxidase-conjugated recombinant protein S1-RBD-His),  
604 incubated for  $30\pm 2$  min at  $25\pm 2^\circ\text{C}$ , washed and TMB substrate (3,3',5,5'-  
605 tetramethylbenzidine diluted in citrate buffer containing hydrogen peroxide) was added.  
606 The reaction was stopped by adding stop solution (diluted sulfuric acid,  $\text{H}_2\text{SO}_4$ , solution,  
607 1.0 M) and the absorbance of each well was read at 450 nm within 10 min using the  
608 Microplate reader (VersaMax).

### 609 **Flow cytometry assay for hACE binding inhibition**

610 Human ACE2-transfected HEK293 cells (prepared in-house) were collected and  
611 washed with FACS buffer supplemented with 2% FBS (GIBCO, CN: 10099-148) in 1X  
612 PBS. One hundred  $\mu$ L of 20  $\mu\text{g}/\text{mL}$  2019-nCoV Spike Protein S1 (Fc Tag) (Sino Biological,  
613 CN: 40591-V02H) was mixed with 100  $\mu$ L of antisera dilutions (serially 5-fold diluted from  
614 1:5 to 1:3,125, total 5 dilutions) at  $25^\circ\text{C}$  for 1 hr. The mixture (200 $\mu$ L) was then added to  
615 the transfected cells (cell no.  $2\times 10^5$ ) followed by incubation at room temperature for 1 hr.  
616 Cells were washed with FACS buffer and incubated with diluted (1:200) anti-human IgG  
617 Fc protein antibody (FITC) (Bethyl Laboratories, CN: A80-104F) on ice for an additional  
618 30 min. After washing, the cells were analyzed in a FACSCanto II flow cytometry (BD  
619 Biosciences) using BD FACSDiva software.

### 620 **Neutralization of live SARS-CoV2 by immune sera by CPE assay**

621 Vero-E6 cells were expanded, and their concentrations were adjusted to  $1.5\times 10^5$   
622 viable cells/mL in culture medium (DMEM containing 10% FBS). The 96-well microtiter

623 plates were seeded with  $1.5 \times 10^4$  cells/100  $\mu\text{L}$ /well. The plates were incubated at  $37^\circ\text{C}$  in  
624 a  $\text{CO}_2$  incubator overnight. The next day, serum samples from vaccinated GPs were  
625 diluted (1:5) starting with 72  $\mu\text{L}$  of serum sample + 288  $\mu\text{L}$  of dilution medium (Dulbecco's  
626 Modified Eagle Medium, DMEM, containing 5% FBS) to yield the first dilution. Then, 7x2-  
627 fold serial dilutions were made with dilution medium (dilution points were adjusted  
628 according to the characteristics of the sample). The challenge virus (SARS-CoV-2-  
629 TCDC#4, Taiwanese strain) was prepared at 100  $\text{TCID}_{50}$  in 50  $\mu\text{L}$  of culture medium,  
630 incubated with 50  $\mu\text{L}$  volume of each serum dilution (50  $\mu\text{L}$ ) (in triplicates) for 1 hr at  $37^\circ\text{C}$ ,  
631 before adding to Vero-E6 cells in triplicates. Medium only was co-incubated with an equal  
632 volume of 100  $\text{TCID}_{50}$  of the viruses for 1 hr at  $37^\circ\text{C}$  and used as 100% infected control.  
633 The plates were incubated at  $37^\circ\text{C}$  in a  $\text{CO}_2$  incubator for 4 days. Cells were then fixed  
634 overnight with 100  $\mu\text{L}$  of 10% formaldehyde prepared in phosphate buffered saline, pH  
635 7.0-7.4, added into each well. The next day formaldehyde solution was discarded by  
636 inverting the plate, and 100  $\mu\text{L}$  of crystal 0.5% violet staining solution was added into each  
637 well and incubated at room temperature for 1 hr. The infection rate was quantified by  
638 ELISA reader and image analysis. The infection rate of medium only at a challenge dose  
639 of 100  $\text{TCID}_{50}$  virus was set at 100% and each serum dilution with greater than 50%  
640 infection was scored as infected. The 50% protective titer was determined by the Reed  
641 and Muench method [53,54].

## 642 **Neutralization assessment by immunofluorescence**

643 Vero-E6 cell monolayers in 96-well plates from the CPE assay (described above)  
644 were also processed for visualization by immunofluorescence assay (IFA): the cells were  
645 stained with anti-SARS-CoV-2 N protein antibody and detected with anti-human IgG-488.  
646 The nuclei were counter stained with DAPI.

## 647 **Neutralization assessment by plaque assay**

648 Serum samples were heat-inactivated for 30 minutes at 56°C and diluted in a 2-  
649 fold serial fashion in MEM (Gibco) with Hepes (Corning) and Gentamicin sulfate (Cellgro)  
650 in U-bottom plates. 50 µL of each serum dilution was mixed with 50 PFU of virus in 50 µL.  
651 The serum/virus mixtures were incubated for 1 hr at 37°C. Fifty µl of the serum/virus  
652 mixtures were then transferred to Vero E6 cell monolayers in flat-bottom 96-well plates  
653 and incubated for 1 h at 37°C. The serum/virus mixture was then removed and replaced  
654 with 1:1 overlay composed of 1.1% methylcellulose (Fisher Chemical) and 2X MEM  
655 (Gibco) supplemented with gentamicin sulfate (Corning) and 4% FBS (Gibco). Plates were  
656 incubated 2 days at 37°C, then fixed with 10% neutral buffered formalin (Fisherbrand)  
657 according to approved SOP and removed from biocontainment. Viral plaques were  
658 counted after staining for 30 minutes with 1% crystal violet in formalin at room temperature.

## 659 **ELISpot for measurement of cellular responses in rats**

660 Spleens from vaccinated rats at 4 WPI were collected in Lymphocyte-conditioned  
661 medium (LCM; RPMI-1640 medium supplemented with 10% FBS and  
662 penicillin/streptomycin) and processed into single cell suspensions. Cell pellets were  
663 resuspended in 5 mL of RBC lysis buffer for 3 min at room temperature (RT), and RPMI-  
664 1640 medium containing penicillin/streptomycin was then added to stop the reaction. After  
665 centrifugation, cell pellets were resuspended in LCM for use in the ELISpot assay. ELISpot  
666 assays were performed using the Rat IFN- $\gamma$  ELISpot<sup>PLUS</sup> kit (MABTECH, Cat. No.: 3220-  
667 4APW), Rat IL-4 T cell ELISpot kit (U-CyTech, Cat. No.: CT081) and Rat IL-2 ELISpot Kit  
668 (R&D Systems, Cat. No.: XEL502). ELISpot plates precoated with capture antibody were  
669 blocked with LCM for at least 30 min at RT. 250,000 rat splenocytes were plated into each  
670 well and stimulated with S1-RBD-His protein plus Th/CTL peptide pool, S1-RBD-His

671 protein, Th/CTL peptide pool, or each single Th/CTL peptide for 18-24 hrs at 37°C. Cells  
672 were stimulated with a final concentration of 1 µg of each protein/peptide per well in LCM.  
673 The spots were developed based on manufacturer's instructions. LCM and ConA were  
674 used for negative and positive controls, respectively. Spots were scanned and quantified  
675 by AID iSpot reader. Spot-forming unit (SFU) per million cells was calculated by  
676 subtracting the negative control wells.

## 677 **Real-time RT-PCR for SARS-CoV-2 RNA quantification**

678 The levels of N gene (subgenomic) mRNA (sgmRNA) were assessed by RT-PCR.  
679 The RT-PCR assay for the sgmRNA utilizes primers and a probe specifically designed to  
680 amplify and bind to a region of the N gene messenger RNA from SARS-CoV-2 (Primers:  
681 SG-N-F: CGATCTCTTG TAGATCTGTTCTC, SG-N-R: GGTGAACCAAGACGCAGTAT  
682 and Probe: FAM- TAACCAGAATGGAGAACGCAGTGGG -BHQ). A plasmid containing a  
683 portion of the N gene messenger RNA served as the control and semi-quantification  
684 standard. The cycling conditions were performed with a one-step PCR protocol: 48 °C for  
685 30 minutes, 95 °C for 10 minutes followed by 40 cycles of 95 °C for 15 seconds, and 1  
686 minute at 55 °C. Data were collected and calculated by Applied Biosystems 7500 Real-  
687 Time PCR System (Thermo Fisher Scientific, USA). The number of copies of RNA per mL  
688 of BAL or swab is calculated by extrapolation from the standard curve and multiplying by  
689 the reciprocal of 0.2 mL extraction volume to give a practical range of 50 to 5 x 10<sup>7</sup> RNA  
690 copies per swab or mL BAL fluid.

691 To measure the RNA levels of SARS-CoV-2, specific primers targeting 26,141 to  
692 26,253 regions in the envelope (E) gene of the SARS-CoV-2 genome were used by  
693 Taqman real-time RT-PCR previously described method [55]. Forward primer E-Sarbeco-  
694 F1 (5'-ACAGGTACGTTAATAGTTAATAGCGT-3'), reverse primer E-Sarbeco-R2 (5'-

695 ATATTGCAGCAGTACGCACACA-3'), and probe E-Sarbeco-P1 (5'-FAM-  
696 AACTAGCCATCCTTACTGCGCTTCG-BBQ-3') were used. A total of 30  $\mu$ L RNA  
697 solution was collected from each sample using a RNeasy Mini Kit (QIAGEN, Germany)  
698 according to the manufacturer's instructions. Five microliters of RNA sample were added  
699 in a total mixture volume of 25  $\mu$ L using Superscript III one-step RT-PCR system with  
700 Platinum Taq Polymerase (Thermo Fisher Scientific, USA). The final reaction mix  
701 contained 400 nM each of forward and reverse primers, 200 nM probe, 1.6 mM of deoxy-  
702 ribonucleoside triphosphate (dNTP), 4 mM magnesium sulphate, 50 nM ROX reference  
703 dye and 1  $\mu$ L of enzyme mixture from the kit. The cycling conditions were performed with  
704 a one-step PCR protocol: 55°C for 10 min for cDNA synthesis, followed by 3 min at 94°C  
705 and 45 amplification cycles at 94°C for 15 sec and 58°C for 30 sec. Data were collected  
706 and calculated by Applied Biosystems 7500 Real-Time PCR System (Thermo Fisher  
707 Scientific, USA). A synthetic 113-bp oligonucleotide fragment was used as a qPCR  
708 standard to estimate copy numbers of viral genome. The oligonucleotides were  
709 synthesized by Genomics BioSci and Tech Co. Ltd. (Taipei, Taiwan).

## 710 **50% tissue culture infectious dose (TCID<sub>50</sub>) assays**

711 Mouse lung tissues were weighed and homogenized in 1 mL of DMEM with 1%  
712 penicillin/streptomycin using a homogenizer. After centrifugation at 13,000 rpm for 10 min,  
713 supernatant was harvested for live virus titration (TCID<sub>50</sub> assay). Briefly, serial 10-fold  
714 dilutions of each sample were inoculated in a Vero-E6 cell monolayer in quadruplicate and  
715 cultured in DMEM with 1% FBS and penicillin/streptomycin. The plates were observed for  
716 cytopathic effects for 4 days. TCID<sub>50</sub> was interpreted as the amount of virus that caused  
717 cytopathic effects in 50% of inoculated wells. Virus titers were expressed as TCID<sub>50</sub>/mL.



## 718 **Histopathological analysis of lung tissues**

719           After fixation with 10% formaldehyde for one week, lung tissues were trimmed,  
720 processed, embedded, sectioned and stained with Hematoxylin and Eosin (H&E), followed  
721 by microscopic examination. To score the lung histopathology, lung section was divided  
722 into 9 equal square areas using a 3 × 3 grid. Lung tissue of every area was scored using  
723 a scoring system. Scores from each of the 9 areas were averaged and this average value  
724 was designated as the animal's score.

725           The scoring system was as follows: 0, Normal, no significant finding; 1, Minor  
726 inflammation with slight thickening of alveolar septa and sparse monocyte infiltration; 2,  
727 Apparent inflammation, alveolus septa thickening with more interstitial mononuclear  
728 inflammatory infiltration; 3, Diffuse alveolar damage (DAD), with alveolus septa thickening,  
729 and increased infiltration of inflammatory cells; 4, DAD, with extensive exudation and  
730 septa thickening, shrinking of alveoli, restricted fusion of the thick septa, obvious septa  
731 hemorrhage and more cell infiltration in alveolar cavities; 5, DAD, with massive cell  
732 filtration in alveolar cavities and alveoli shrinking, sheets of septa fusion, and hyaline  
733 membranes lining the alveolar walls.

734

735 **Acknowledgements**

736 We thank Dr. Qian Gao of Sinovac for providing CPE neutralization titrations free of  
737 charge.

## 738 **References**

- 739 1. Wang C, Horby PW, Hayden FG, Gao GF. A novel coronavirus outbreak  
740 of global health concern. *Lancet* (London, England) 2020; 395: 470–473.
- 741 2. Johns Hopkins Coronavirus Resource Center. COVID-19 Dashboard.  
742 <https://coronavirus.jhu.edu/map.html>.
- 743 3. Liu L, Wei Q, Lin Q, Fang J, Wang H, Kwok H, et al. Anti-spike IgG causes severe  
744 acute lung injury by skewing macrophage responses during acute SARS-CoV  
745 infection. *JCI Insight*. 2019; 4: e123158. doi: 10.1172/jci.insight.123158
- 746 4. Ricke, DO. Two Different Antibody-Dependent Enhancement (ADE) Risks for  
747 SARS-CoV-2 Antibodies. *Front. Immunol.* 2021;12:640093. doi:  
748 10.3389/fimmu.2021.640093.
- 749 5. Long Q, Tang X, Shi Q, Li Q, Deng H, Yuan J, et al. Clinical and immunological  
750 assessment of asymptomatic SARS-CoV-2 infections. *Nat. Med.* 2020; 26:1200–  
751 1204.
- 752 6. Tai W, Zhang X, Drelich A, Shi J, Hsu J, Luchsinger L, et al. A novel receptor-  
753 binding domain (RBD)-based mRNA vaccine against SARS-CoV-2. *Cell research*.  
754 2020; 30:932–935.
- 755 7. Walls AC, Park Y, Tortorici MA, Wall A, McGuire AT, Veessler D, et al. Structure,  
756 Function, and Antigenicity of the SARS-CoV-2 Spike Glycoprotein. *Cell*. 2020;181:  
757 281-292.e6.
- 758 8. Wang Q, Zhang L, Kuwahara K, Li L, Liu Z, Li T, et al. Immunodominant SARS  
759 Coronavirus Epitopes in Humans Elicited both Enhancing and Neutralizing Effects  
760 on Infection in Non-human Primates. *ACS Infect. Dis.* 2016;2: 361–376.
- 761 9. Fulginiti VA, Eller JJ, Sieber OF, Joyner JW, Minamitani M, Meiklejohn G.  
762 Respiratory virus immunization. I. A field trial of two inactivated respiratory virus

- 763 vaccines; an aqueous trivalent parainfluenza virus vaccine and an alum-  
764 precipitated respiratory syncytial virus vaccine. *Am. J. Epidemiol.* 1969;89: 435–  
765 448 (1969).
- 766 10. Bolles M, Deming D, Long K, Agnihothram S, Whitmore A, Ferris M, et al. A  
767 double-inactivated severe acute respiratory syndrome coronavirus vaccine  
768 provides incomplete protection in mice and induces increased eosinophilic  
769 proinflammatory pulmonary response upon challenge. *J Virol.* 2011;85(23):12201-  
770 15. doi: 10.1128/JVI.06048-11.
- 771 11. Liu L, Wei Q, Lin Q, Fang J, Wang H, Kwok H, et al. Anti-spike IgG causes severe  
772 acute lung injury by skewing macrophage responses during acute SARS-CoV  
773 infection. 2019;4(4): e123158.
- 774 12. Shubin Z, Li W, Poonia B, Ferrari G, LaBranche C, Montefiori D, et al. An HIV  
775 Envelope gp120-Fc Fusion Protein Elicits Effector Antibody Responses in Rhesus  
776 Macaques. *Clin. Vaccine Immunol.* 2017;24 (6):e00028-17. doi:  
777 10.1128/CVI.00028-17.
- 778 13. Zhao B, Zhang X, Krummenacher C, Song S, Gao L, Zhang H, et al.  
779 Immunization With Fc-Based Recombinant Epstein-Barr Virus gp350 Elicits  
780 Potent Neutralizing Humoral Immune Response in a BALB/c Mice Model. *Front.*  
781 *Immunol.* 2018;9: 932.
- 782 14. Liu H, Saxena A, Sidhu SS, Wu D. Fc Engineering for Developing Therapeutic  
783 Bispecific Antibodies and Novel Scaffolds. *Frontiers in Immunology.* 2017;8: 38.
- 784 15. Seow J, Graham C, Merrick B, Acors S, Pickering S, Steel KJA, et al. Longitudinal  
785 observation and decline of neutralizing antibody responses in the three months  
786 following SARS-CoV-2 infection in humans. *Nat Microbiol.* 2020;5: 1598–1607.  
787 doi:10.1038/s41564-020-00813-8
- 788 16. Ibarrondo FJ, Fulcher JA, Goodman-Meza D, Elliott J, Hofmann C, Hausner MA, et

- 789 al. Rapid decay of anti-SARS-CoV-2 antibodies in persons with mild Covid-19. *N*  
790 *Engl J Med.* 2020;383: 1085-1087. doi:10.1056/NEJMc2025179
- 791 17. Sauer K, Harris T. An Effective COVID-19 Vaccine Needs to Engage T Cells.  
792 *Front. Immunol.* 2020;11, 581807.
- 793 18. Jiang XL, Wang G, Zhao X, Yan F, Yao L, Kou Z, et al. Lasting antibody and T  
794 cell responses to SARS-CoV-2 in COVID-19 patients three months after infection.  
795 *Nat Commun.* 2021;12, 897. doi:10.1038/s41467-021-21155-x
- 796 19. Yamoshi S, Yasuhara A, Ito M, Akasaka O, Nakamura M, Nakchi I, et al. Antibody  
797 titers against SARS-CoV-2 decline, but do not disappear for several months.  
798 *EClinicalMedicine.* 2020;32, 100734. doi:10.1016/j.eclinm.2021.100734
- 799 20. Ng O-W, Chia A, Tan AT, Jadi RS, Leong HN, Bertoletti A, et al. Memory T cell  
800 responses targeting the SARS coronavirus persist up to 11 years post-infection.  
801 *Vaccine.* 2016;34, 2008–2014.
- 802 21. Le Bert N, Tan AT, Kunasegaran K, Tham CYL, Hafezi M, Chia A, et al. SARS-  
803 CoV-2-specific T cell immunity in cases of COVID-19 and SARS, and uninfected  
804 controls. *Nature.* 2020;584, 457–462.
- 805 22. Ferretti AP, Kula T, Wang Y, Nguyen DMV, Weinheimer A, Dunlap GS, et al.  
806 Unbiased Screens Show CD8(+) T Cells of COVID-19 Patients Recognize Shared  
807 Epitopes in SARS-CoV-2 that Largely Reside outside the Spike Protein. *Immunity.*  
808 2020; 53(5):1095-1107.e3. doi:10.1016/j.immuni.2020.10.006.
- 809 23. Ahmed SF, Quadeer AA, McKay MR. Preliminary Identification of Potential  
810 Vaccine Targets for the COVID-19 Coronavirus (SARS-CoV-2) Based on SARS-  
811 CoV Immunological Studies. *Viruses.* 2020;12(3): 254 doi:10.3390/v12030254.
- 812 24. Yang J, James E, Roti M, Huston L, Gebe JA, Kwok WW, et al. Searching  
813 immunodominant epitopes prior to epidemic: HLA class II-restricted SARS-CoV  
814 spike protein epitopes in unexposed individuals. *Int. Immunol.* 2009;21: 63–71.

- 815 doi: 10.1093/intimm/dxn124.
- 816 25. Lv Y, Ruan Z, Wang L, Ni B, Wu Y. Identification of a novel conserved HLA-  
817 A\*0201-restricted epitope from the spike protein of SARS-CoV. *BMC Immunol.*  
818 2009;10: 61.
- 819 26. Liu S-J, Leng C-H, Lien S-p, Chi H-Y, Huang C-Y, Lin C-L, et al. Immunological  
820 characterizations of the nucleocapsid protein based SARS vaccine candidates.  
821 *Vaccine.* 2006;24: 3100–3108.
- 822 27. Rivino L, Tan AT, Chia A, Kumaran EAP, Grotenbreg GM, MacAry PA, et al.  
823 Defining CD8+ T cell determinants during human viral infection in populations of  
824 Asian ethnicity. *J. Immunol.* 2013;191: 4010–4019.29.
- 825 28. Wang Y-D, Sin W-Y, Xu G-B, Yang H-H, Wong T-y, Pang X-W, et al. T-Cell  
826 Epitopes in Severe Acute Respiratory Syndrome (SARS) Coronavirus Spike  
827 Protein Elicit a Specific T-Cell Immune Response in Patients Who Recover from  
828 SARS. *J. Virol.* 2004;78(11):5612-8. doi: 10.1128/JVI.78.11.5612-5618.2004
- 829 29. Grifoni A, Sidney J, Zhang Y, Scheuermann RH, Peters B, Sette A, et al. A  
830 Sequence Homology and Bioinformatic Approach Can Predict Candidate Targets  
831 for Immune Responses to SARS-CoV-2. *Cell Host Microbe.* 2020;27: 671-  
832 680.e2.31.
- 833 30. Fast E, Chen B. Potential T-cell and B-cell Epitopes of 2019-nCoV. *bioRxiv*  
834 2020.02.19.955484. 2020. doi:10.1101/2020.02.19.955484.
- 835 31. Wang CY, Wang P-N, Chiu M-J, Finstad CL, Lin F, Lynn S, et al. UB-311, a novel  
836 UBITH(®) amyloid  $\beta$  peptide vaccine for mild Alzheimer's disease. *Alzheimer's*  
837 *Dement. (New York, N. Y.)* 2017;3: 262–272.
- 838 32. Weeratna RD, Brazolot Millan CL, McCluskie MJ, Davis HL. CpG ODN can re-  
839 direct the Th bias of established Th2 immune responses in adult and young mice.  
840 *FEMS Immunol. Med. Microbiol.* 2001;32: 65–71.

- 841 33. Iho S, Maeyama J, Suzuki F. CpG oligodeoxynucleotides as mucosal adjuvants.  
842 Hum. Vaccin. Immunother. 2015;11: 755–760.
- 843 34. Ghimire TR. The mechanisms of action of vaccines containing aluminum  
844 adjuvants: an in vitro vs in vivo paradigm. Springerplus. 2015;4:181.
- 845 35. Marrack P, McKee AS, Munks MW. Towards an understanding of the adjuvant  
846 action of aluminium. Nat. Rev. Immunol. 2009;9: 287–293.
- 847 36. Wang CY, Lin F, Ding S, Peng W-J. Designer Peptides and Proteins for the  
848 Detection Prevention and Treatment of Coronavirus Disease, 2019 (COVID-19).  
849 2020.
- 850 37. Salam N, Rane S, Das R, Faulkner M, Gund R, Kandpal U, et al. T cell ageing:  
851 effects of age on development, survival & function. Indian J Med Res.  
852 2013;138(5): 595-608.
- 853 38. Crooke SN, Ovsyannikova IG, Poland GA, et al. Immunosenescence and human  
854 vaccine immune responses. Immun Ageing. 2019;16: 25. doi:10.1186/s12979-  
855 019-0164-9
- 856 39. Wang H, Zhang Y, Huang B, Deng W, Quan Y, Wang W, et al. Development of an  
857 Inactivated Vaccine Candidate, BBIBP-CorV, with Potent Protection against  
858 SARS-CoV-2. Cell. 2020;182: 713-721.e9.
- 859 40. Gao Q, Bao L, Mao H, Wang L, Xu K, Yang M, et al. Development of an  
860 inactivated vaccine candidate for SARS-CoV-2. Science. 2020;369(6499): 77-81.  
861 doi: 10.1126/science.abc1932
- 862 41. Loch C. Vaccines against COVID-19. Anaesthesia, critical care & pain medicine  
863 2020. doi:10.1016/j.accpm.2020.10.006.
- 864 42. Bos R, Rutten L, van der Lubbe JEM, Bakkers MJG, Hardenberg G, Wegmann F.  
865 et al. Ad26 vector-based COVID-19 vaccine encoding a prefusion-stabilized  
866 SARS-CoV-2 Spike immunogen induces potent humoral and cellular immune

- 867 responses. NPJ vaccines. 2020;5: 91.
- 868 43. United States Food and Drug Administration. Guidance for Industry: Development  
869 and Licensure of Vaccines to Prevent COVID-19 Guidance for Industry. 2020.
- 870 44. Weeratna RD, Millan CL, McCluskie MJ, Davis HL. CpG ODN can re-direct the Th  
871 bias of established Th2 immune responses in adult and young mice. FEMS  
872 Immunol. Med. Microbiol. 2001;32: 65–71.
- 873 45. Ebensen T, Delandre S, Prochnow B, Guzmán CA, Schulze K. The Combination  
874 Vaccine Adjuvant System Alum/c-di-AMP Results in Quantitative and Qualitative  
875 Enhanced Immune Responses Post Immunization. Front. Cell. Infect. Microbiol.  
876 2019;9: 31.
- 877 46. Israelow B, Song E, Mao T, Lu P, Meir A, Liu F, et al. Mouse model of SARS-  
878 CoV-2 reveals inflammatory role of type I interferon signaling. J. Exp. Med. 2020;  
879 217(12): e20201241.
- 880 47. Muñoz-Fontela C, Dowling W, Funnell SGP, Gsell P-S, Riveros-Balta AX,  
881 Albrecht RA, et al. Animal models for COVID-19. Nature. 2020;586: 509–515.
- 882 48. Cleary SJ, Pitchford SC, Amison RT, Carrington R, Cabrera CLR, Magnen M, et  
883 al. Animal models of mechanisms of SARS-CoV-2 infection and COVID-19  
884 pathology. Br. J. Pharmacol. 2020;177: 4851–4865.
- 885 49. Munster VJ, Feldmann F, Williamson BN, van Doremalen N, Pérez-Pérez L,  
886 Schulz J, et al. Respiratory disease in rhesus macaques inoculated with SARCoV-  
887 2. Nature. 2020;585: 268–272.
- 888 50. Rockx B, Kuiken T, Herfst S, Bestebroer T, Lamers MM, Munnink BBO, et al.  
889 Comparative pathogenesis of COVID-19, MERS, and SARS in a nonhuman  
890 primate model. Science. 2020;368: 1012-1015.
- 891 51. Grifoni A, Weiskopf D, Ramirez SI, et al. Targets of T Cell Responses to SARS-  
892 CoV-2 Coronavirus in Humans with COVID-19 Disease and Unexposed



- 893 Individuals [published online ahead of print, 2020 May 20]. *Cell*. 2020;S0092-  
894 8674(20)30610-3. doi:10.1016/j.cell.2020.05.015
- 895 52. Draize J, Woodard G, Calvery H, Draize JH, Calvery HO. Methods for the study of  
896 irritation and toxicity of substances applied topically to the skin and mucous  
897 membranes. *J. Pharmacol. Exp. Ther.* 1944;82: 377–390.
- 898 53. Ramakrishnan MA. Determination of 50% endpoint titer using a simple formula.  
899 *World J. Virol.* 2016;5, 85–86.
- 900 54. Reed LJ, Muench, HA. A Simple method of estimating fifty per cent endpoints.  
901 *Am. J. Epidemiol.* 1938;27, 493–497.
- 902 55. Corman VM, Landt O, Kaisre M, Molenkamp R, Meijer A, Chu DKW, et al.  
903 Detection of 2019 novel coronavirus (2019-nCoV) by real-time RT-PCR.  
904 *European communicable disease bulletin.* 2020;25: 2000045. doi:10.2807/1560-  
905 7917.ES.2020.25.3.2000045
- 906

## Figures

A

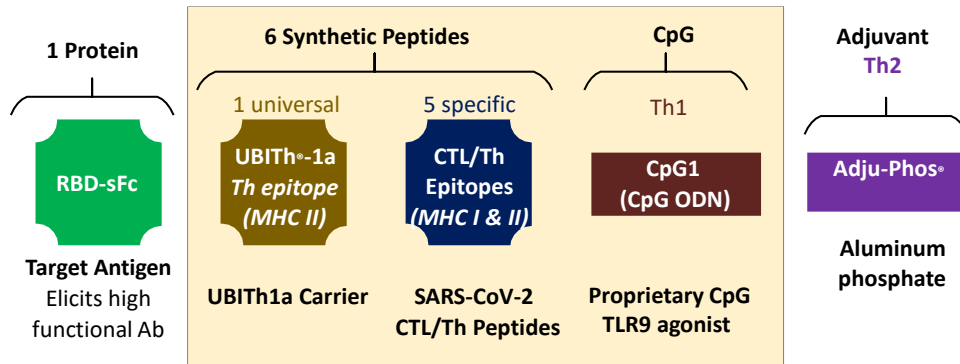

B

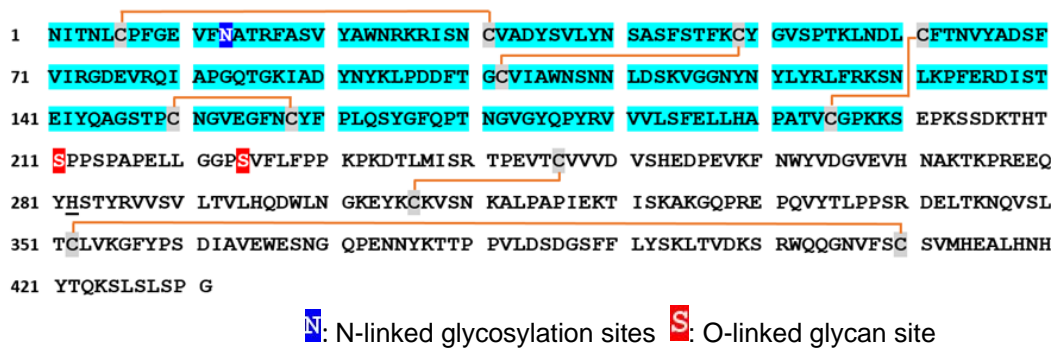

C

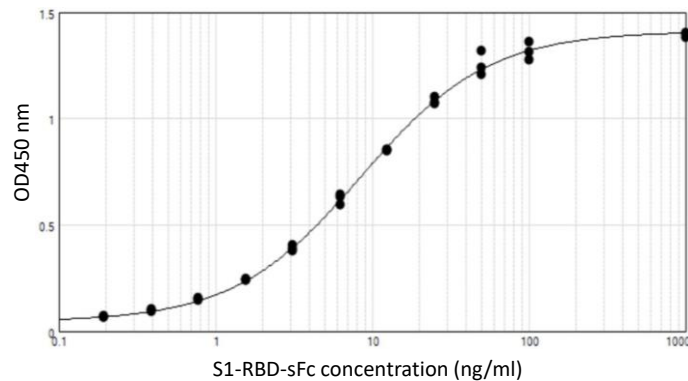

**Fig 1. Components and Sequence of the UB-612 Multitope Vaccine.**

(A) UB-612 vaccine contains an S1-RBD-sFc fusion protein to elicit B cell responses, plus five synthetic Th/CTL peptides for class I and II MHC molecules derived from SARS-CoV2 S2, M, and N proteins, and the UBITH1a peptide (a proprietary T helper peptide). Among the 5 SARS-CoV2 peptides, there are 3 from S2, 1 from N and 1 from M proteins. These

components are mixed with CpG1 and Adju-Phos adjuvant to constitute the UB-612 vaccine drug product.

- (B) Sequence of S1-RBD-sFc. S1-RBD-sFc protein is a glycoprotein consisting of one N-linked glycan (Asn13) and two O-linked glycans (Ser211 and Ser224). Light blue shading indicates RBD of SARS-CoV-2 and no shading indicates the sFc fragment of an IgG1. The substitution of His297 for Asn297 (EU-index numbering) in single chain Fc, His282 in S1-RBD-sFc, is indicated by underline. S1-RBD-sFc protein contains 431 amino acid residues, including 12 cysteine residues (Cys6, Cys31, Cys49, Cys61, Cys102, Cys150, Cys158, Cys195, Cys246, Cys306, Cys352 and Cys410), forming 6 pairs of disulfide bonds (Cys6-Cys31, Cys49-Cys102, Cys61-Cys195, Cys150-Cys158, Cys246-Cys306 and Cys352-Cys410), which are shown as orange lines.
- (C) hACE2 binding ability of S1-RBD-sFc, as determined via ELISA.

A

| GP group | No. of guinea pigs | Vaccine with ISA50 V2 adjuvant | Vaccine dose |        |
|----------|--------------------|--------------------------------|--------------|--------|
|          |                    |                                | Week 0       | Week 3 |
| GP-1     | 5                  | S1-RBD-sFc*                    | 200 µg       | 100 µg |
| GP-2     | 5                  | S1-RBDa-sFc**                  | 200 µg       | 100 µg |
| GP-3     | 5                  | S1-RBD-Fc***                   | 200 µg       | 100 µg |

\* S1-RBD-sFc: RBD (aa340-539) – single chain Fc fusion protein;

\*\* S1-RBDa-sFc: RBD (aa340-539, Cys-mutation) – single chain Fc fusion protein;

\*\*\* S1-RBD-Fc: RBD (aa340-539) – double chain Fc fusion protein.

B

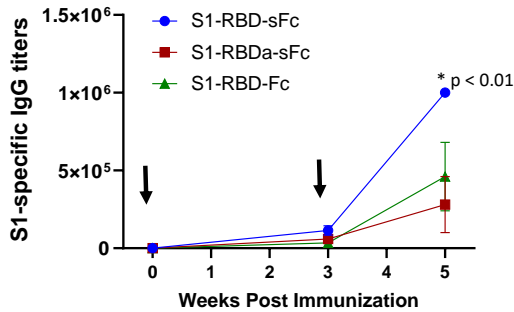

C

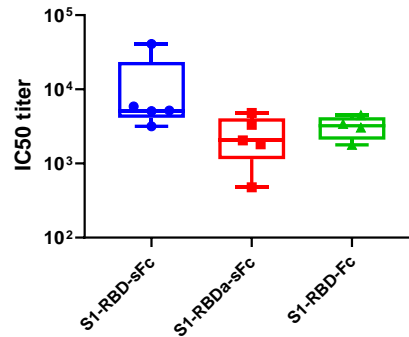

D

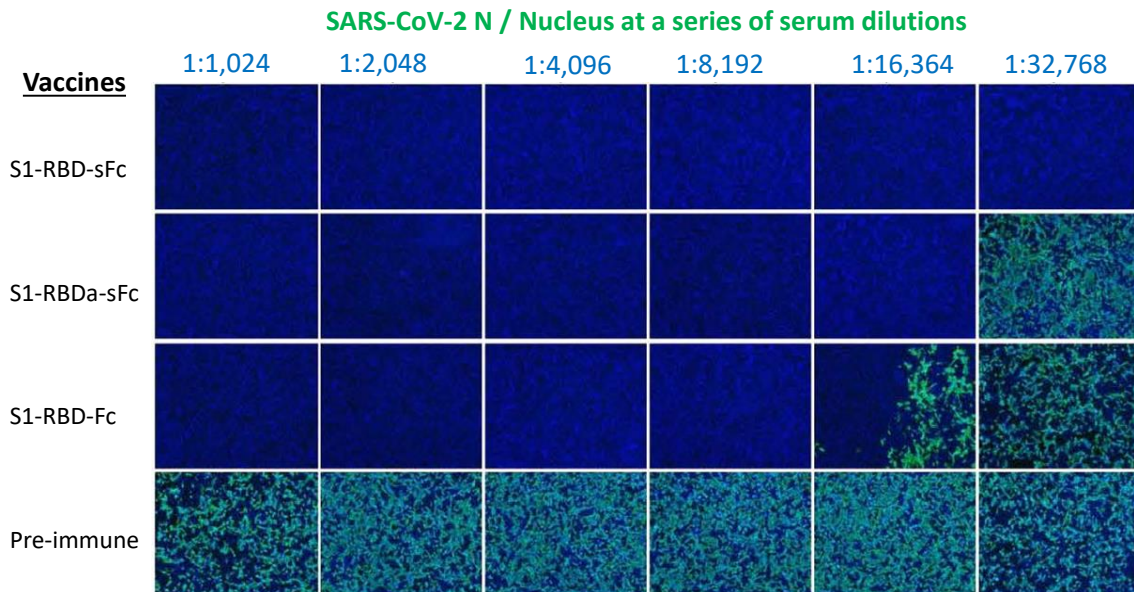

**Fig 2. S1-specific binding and neutralizing antibody responses of guinea pig immune sera.**

(A) Guinea pig study design: animals were immunized with S1-RBD-sFc, S1-RBDa-sFc, or S1-RBD-Fc (n = 5 each group) at weeks 0 and 3 via intramuscular route. Immune sera were collected at 0, 3, and 5 weeks post initial immunization (WPI). Anti-S1 binding antibodies were detected by ELISA and neutralizing antibody titers were detected via CPE assay against wild

- (B) S1-specific antibody temporal responses. Results shown as group geometric mean (GMT)  $\pm$  standard error (SE). Immunization time points are shown with black arrows. \* indicates that the statistical significance compared S1-RBD-sFC with S1-RBDa-sFC or S1-RBD-Fc immunization groups.
- (C) Neutralization and inhibitory dilution ID50 titers in S1 protein binding to ACE2 on ELISA by guinea pig sera collected at 2 weeks after the 2nd immunization (5 WPI).
- (D) Examples of nuclei count staining of Vero-E6 cells in the neutralization assay. Monolayers of Vero-E6 cells infected with virus-serum mixtures were assessed by immunofluorescence (IFA). Cells were stained with human anti-SARS-CoV-2 N protein antibody and detected with anti-human IgG-488 (green). The nuclei were counterstained with DAPI (4',6-diamidino-2-phenylindole) (blue).

**A**

| Rat group | No. of rats | Vaccine | Dose   | Adjuvant       | Dosing schedule |
|-----------|-------------|---------|--------|----------------|-----------------|
| A         | 3           | UB-612  | 10 µg  | ISA51/CpG3     | Week 0 & 2      |
| B         | 3           | UB-612  | 30 µg  | ISA51/CpG3     | Week 0 & 2      |
| C         | 3           | UB-612  | 100 µg | ISA51/CpG3     | Week 0 & 2      |
| D         | 3           | UB-612  | 300 µg | ISA51/CpG3     | Week 0 & 2      |
| E         | 3           | UB-612  | 10 µg  | Adju-Phos/CpG1 | Week 0 & 2      |
| F         | 3           | UB-612  | 30 µg  | Adju-Phos/CpG1 | Week 0 & 2      |
| G         | 3           | UB-612  | 100 µg | Adju-Phos/CpG1 | Week 0 & 2      |
| F         | 3           | UB-612  | 300 µg | Adju-Phos/CpG1 | Week 0 & 2      |

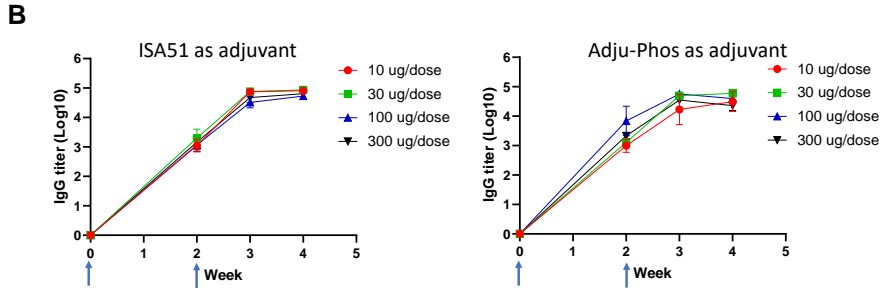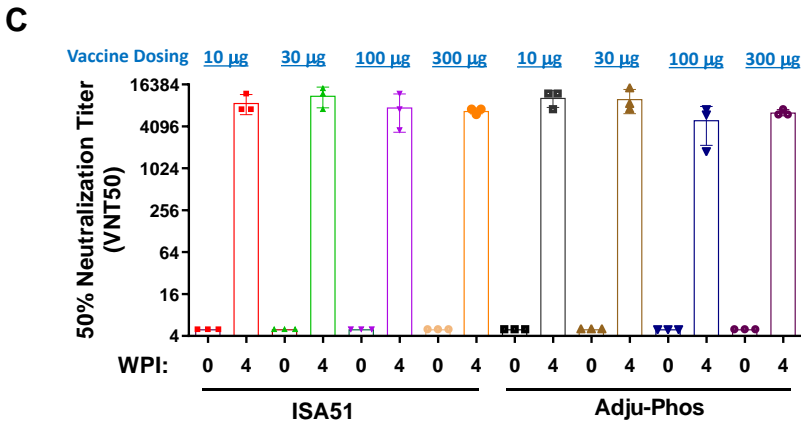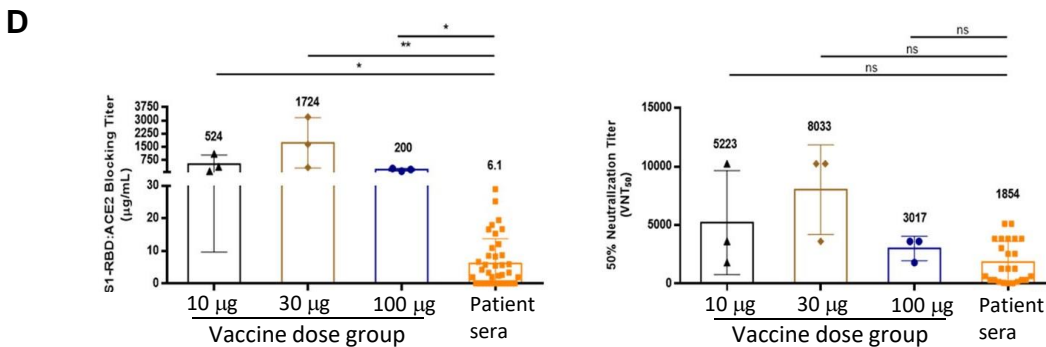

**Fig 3. Humoral immunogenicity testing in rats.**

(A) Rat immunization study design. Immunogenicity of UB-612 adjuvanted with ISA51/CpG3 or Adju-Phos(R)/CpG1. Sprague Dawley rats were immunized at weeks 0 and 2 with UB-612 vaccine (at a dose range of 10-300 µg of S1-RBD-sF, formulated with synthetic designer peptides and adjuvants).

- (B) S1-RBD specific temporal antibody responses in immune sera at 0, 2, 3, and 4 WPI were assayed by ELISA. The rat groups in the left or right panels received vaccines with ISA51/CpG3 or Adju-Phos(R)/CpG1 as adjuvant.
- (C) Samples taken 4 WPI from rats immunized at weeks 0 and 2 with UB-612 vaccine adjuvanted with ISA51/CpG3 or Adju-Phos/CpG1. Potent neutralization of live SARS-CoV-2 by rat immune sera. Neutralization titers expressed as VNT50.
- (D) hACE2 binding inhibiting (left) and neutralizing antibody (right) titers of sera from UB-612 with Adju-Phos(R)/CpG1 vaccinated rats are higher than titers in convalescent COVID-19 patients (HCS). \*  $p \leq 0.05$ , \*\*  $p \leq 0.01$  and NS (not significant) (Kruskal- Wallis ANOVA with Dunn's multiple comparisons test)

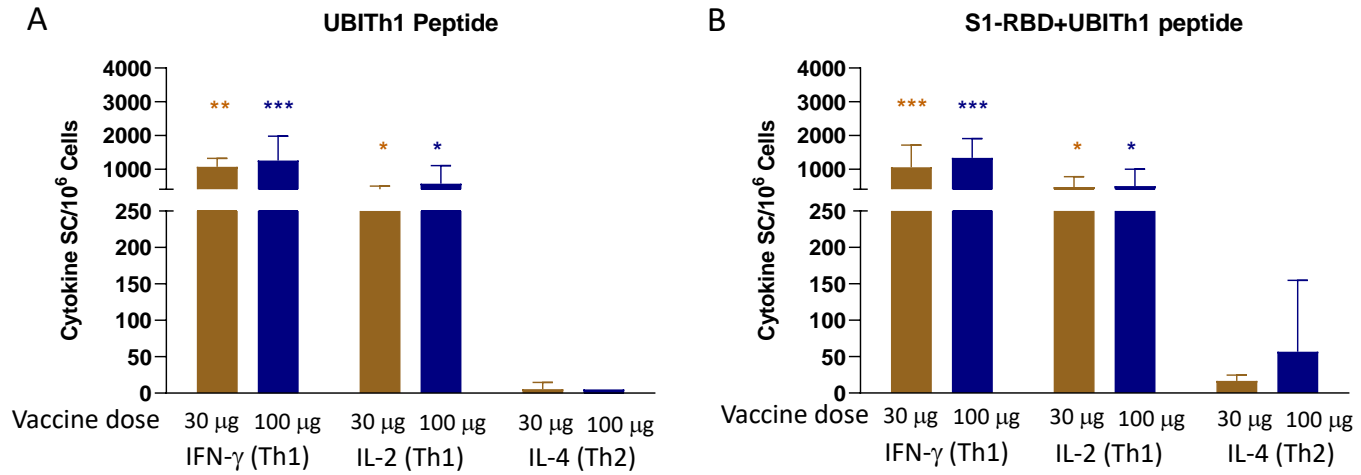

**Fig 4. Cellular immunogenicity testing in rats (ELISpot detection of IFN- $\gamma$ , IL-2 and IL-4 secreting cells in UB-612 immunized rats).** Groups of rats were immunized with 30  $\mu$ g or 100  $\mu$ g UB-612 at Weeks 0 and 2. Splenocytes were collected at Week 4 and stimulated with the Th/CTL peptide pool alone (UBITH1 peptide, A) or with Th/CTL peptide pool plus S1-RBD (S1-RBD+UBITH1 peptide, B) used in the UB-612 vaccine composition. IFN- $\gamma$ , IL-2 and IL-4-secreting splenocytes were determined by ELISpot analysis. Cytokine-secreting cells (SC) per million cells was calculated by subtracting the negative control wells. Bars represent the mean SD (n = 3). The secretion of IFN- $\gamma$  or IL-2 was observed to be significantly higher than that of IL-4 in the 30 and 100  $\mu$ g group (\*  $p < 0.05$ , \*\*  $p < 0.01$ , \*\*\*  $p < 0.005$ ).

(A) ELISpot detection of IFN- $\gamma$ , IL-2 and IL-4 responses from cells stimulated with UBITH1 peptide pool.

(B) ELISpot detection of IFN- $\gamma$ , IL-2 and IL-4 responses from cells stimulated with UBITH1 peptide pool in combination with S1-RBD



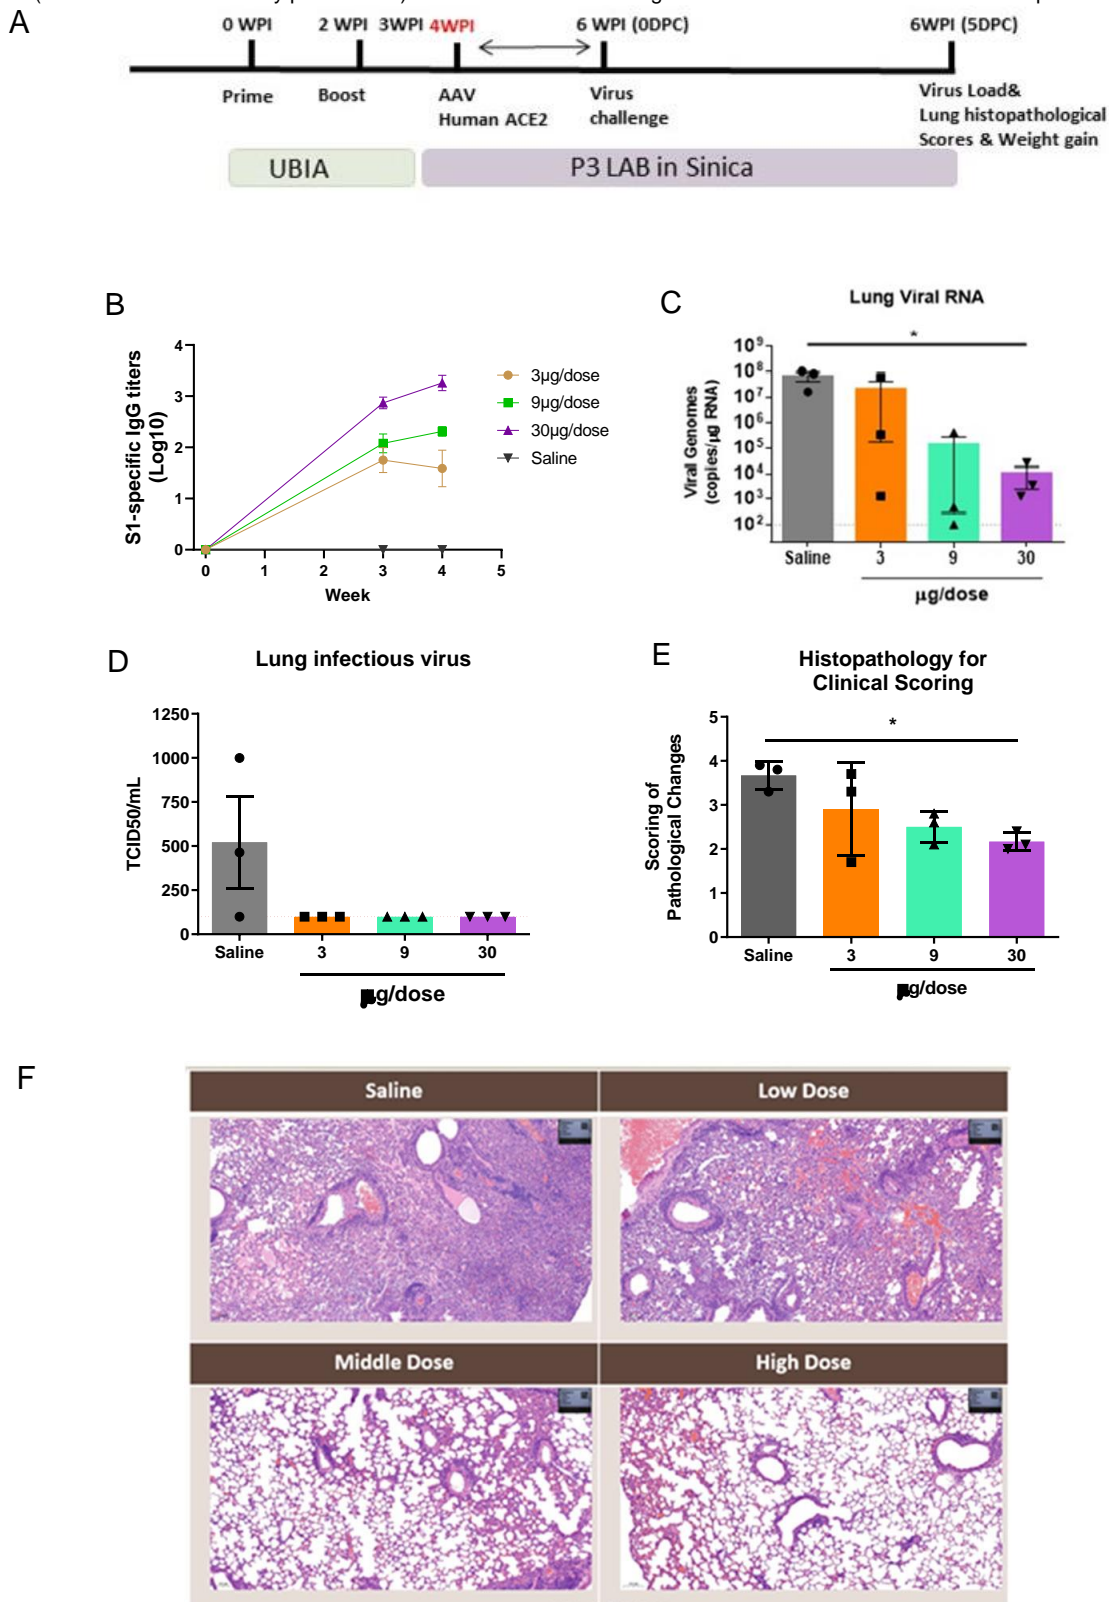

**Fig 5. UB-612 vaccine immunogenicity in BALB/C mice and protective immunity against live SARS-CoV-2 challenge in hACE-transduced mice.** Groups of BALB/C mice were immunized with 3 μg, 9 μg or 30 μg UB-612 vaccine or saline at Weeks 0 and 2. Serum samples collected at Weeks 3 and 4

were evaluated for S1-RBD-specific antibody responses. The mice were transduced with AAV-RBD at Week 4 and challenged with  $10^6$  PFU TCID<sub>50</sub> of SARS-CoV-2 virus (hCoV-19/Taiwan/4/2020) by intratracheal infection at Week 6. The lung viral load and pathology were detected at 5 days after infection.

- (A) Immunization and challenge schedule.
- (B) S1-RBD-specific antibody titers at Weeks 0, 3 and 4 were measured with significant dose dependent response trend. \*  $p < 0.05$  between 3 and 9  $\mu\text{g}$  groups; \*\*\*  $p < 0.005$  between 3 and 30  $\mu\text{g}$  groups.
- (C) SARS-CoV-2 viral load RNA in lung were determined by RT-PCR. Significant difference is indicated between the saline and 30  $\mu\text{g}$  groups, \*  $p < 0.05$ .
- (D) The live virus titers in lung were determined by TCID<sub>50</sub>.
- (E) Lung pathological scores on Day 5 after challenge. Significant difference is indicated between the saline and 30  $\mu\text{g}$  groups, \*  $p < 0.05$ .
- (F) Lung pathology. Stained sections of mouse lung tissues from different vaccination groups of mice challenged with live virus. The vaccine dose: Low dose: 3  $\mu\text{g}$ ; Middle dose: 9  $\mu\text{g}$ , or High dose: 30  $\mu\text{g}$  UB-612 vaccine; and Saline as negative control.

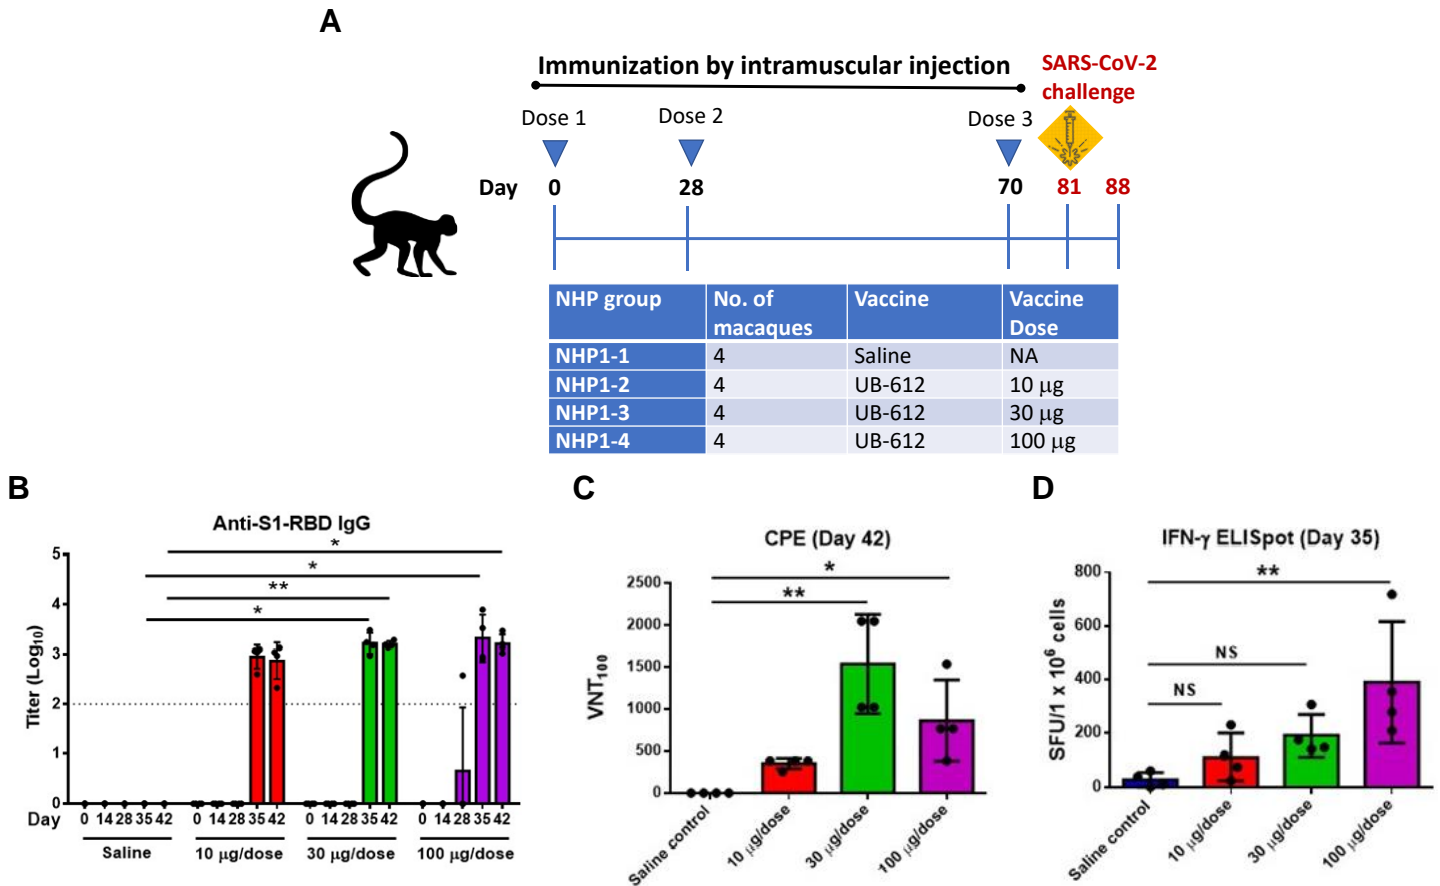

**Fig 6. Immunogenicity results in rhesus macaques (Study 1).**

(A) The immunization study design and groups in rhesus macaques (Study 1).

(B) Direct binding of rhesus macaque (RM) immune sera to S1-RBD on ELISA. ELISA-based serum antibody titer (mean  $\text{Log}_{10}$  SD) was defined as the highest dilution fold with  $\text{OD}_{450}$  value above the cutoff value. \*  $p \leq 0.05$ , \*\*  $p \leq 0.01$

(C) Potent neutralization of live SARS-CoV-2 by RM immune sera. Immune sera collected at Day 42 from RM vaccinated at weeks 0 and 4 were assayed in SARS-CoV-2 infected Vero-E6 cells for cytopathic effect (CPE).

(D) ELISpot analysis of RM PBMC cells stimulated with Th/CTL peptide pool. PBMCs were collected at Day 35 and stimulated with Th/CTL peptide pool. IFN- $\gamma$ -secreting cells were determined by ELISpot analysis. \*\*  $p \leq 0.01$ .

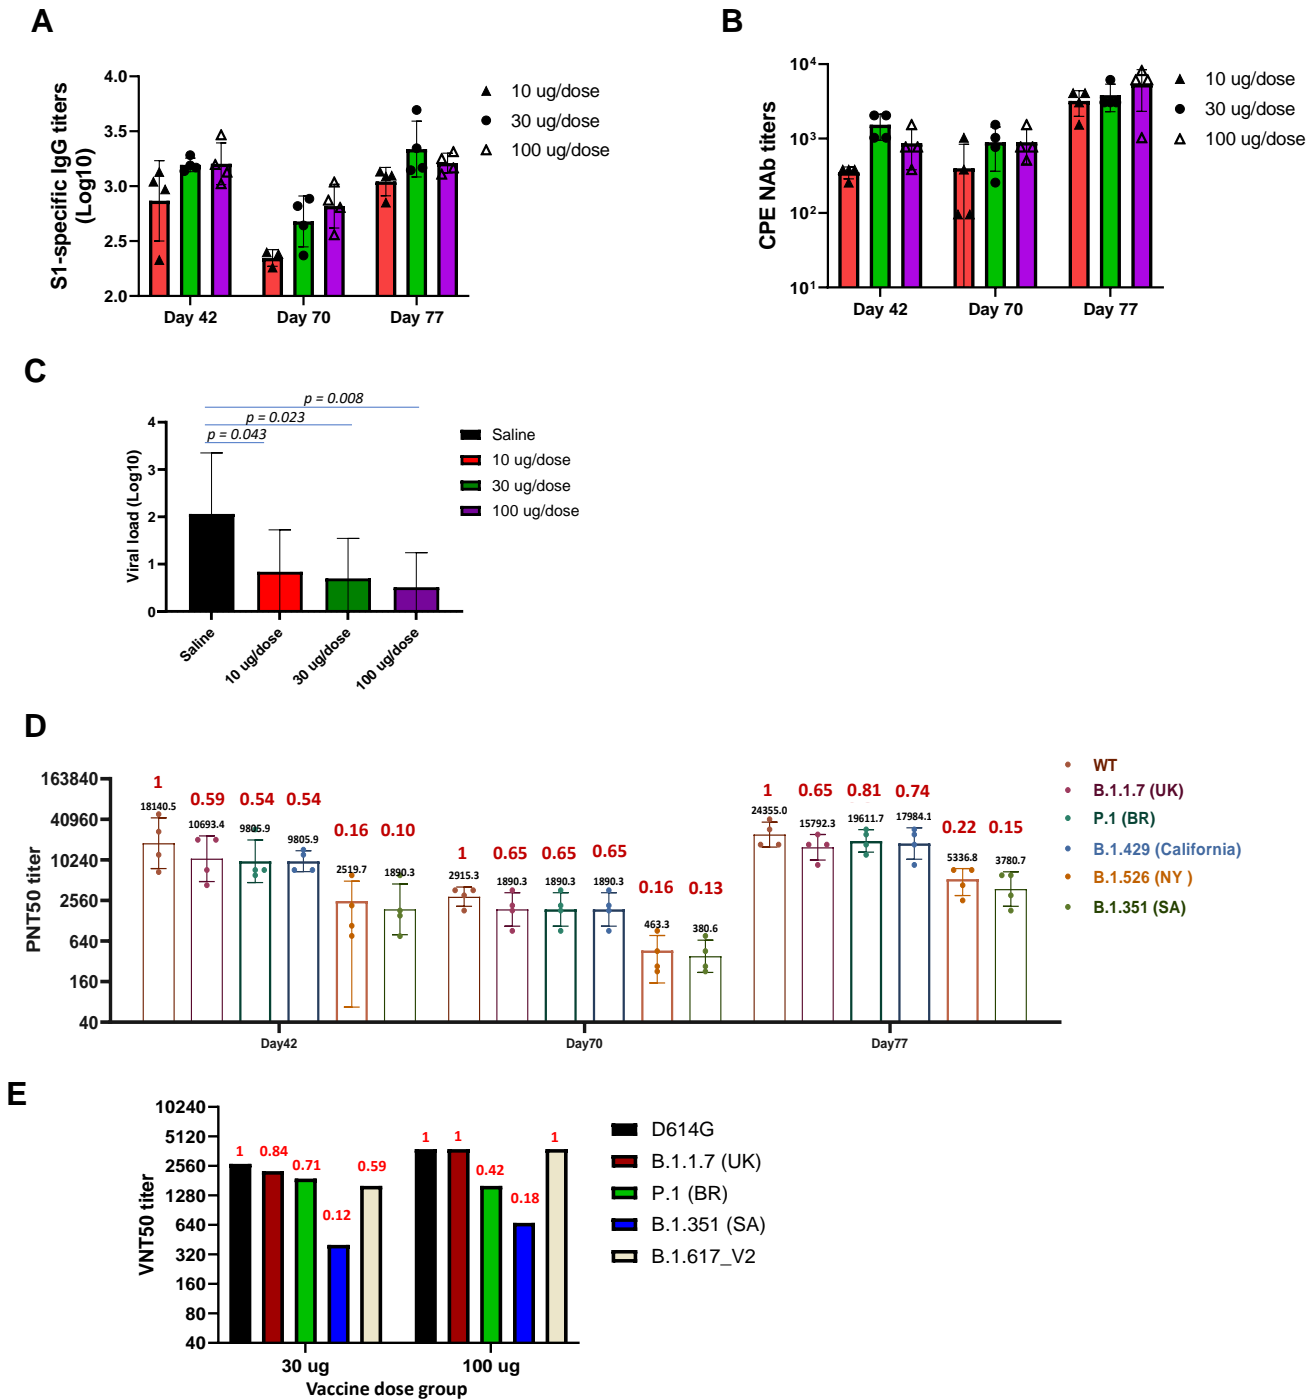

**Fig 7. The 3<sup>rd</sup> dose of vaccine boosted S1-specific IgG titers and neutralizing antibody responses in rhesus macaque (Study 1) and significantly reduced viral load in lung after SARS-CoV-2 challenge.**

(A) Direct binding of rhesus macaque (RM) immune sera to S1-RBD on ELISA in macaque serum samples collected on Day 42 (14 days after the 2nd immunization), Day 70 (prior to the 3rd

immunization), and Day 77 (1 week after the 3<sup>rd</sup> immunization).

(B) Potent neutralization of live SARS-CoV-2 by RM immune sera by CPE assay in macaque serum samples collected on Day 42, Day 70, and Day 77.

(C) The macaques were challenged at 11 days after the 3<sup>rd</sup> immunization (Day 81) with SARS-CoV-2 ( $10^6$  TCID<sub>50</sub>) intratracheally. The viral loads were determined by viral RNA copies/gram of lung tissue at 7 days after challenge (Day 88). Neutralizing antibody responses against SARS-CoV-2 pseudoviruses expressing the Spike proteins from wild type Wuhan strain (WT) and 5 variants of concerns (VOCs: B.1.1.7, P.1, B.1.429, B.1.526 and B.1.351) in macaque serum samples collected on Day 42, Day 70, and Day 77 from the 100  $\mu$ g vaccine dose group. After the 3<sup>rd</sup> immunization, the NAb titers were boosted. The numbers on each bar indicate the ratio of GMT VNT<sub>50</sub> of VOC/GMT VNT<sub>50</sub> of WT.

(D) Neutralizing antibody responses against SARS-CoV-2 live viruses D614G and variants (B.1.1.7, P.1, B.1.429, B.1.351 and B.1.617\_V2) in macaque serum samples collected from both 30 mg and 100 mg vaccine dose groups on Day 77 (7 days after the 3<sup>rd</sup> immunization). The numbers on each bar indicate the ratio of GMT VNT<sub>50</sub> of VOC/GMT VNT<sub>50</sub> of D614G.

**A**

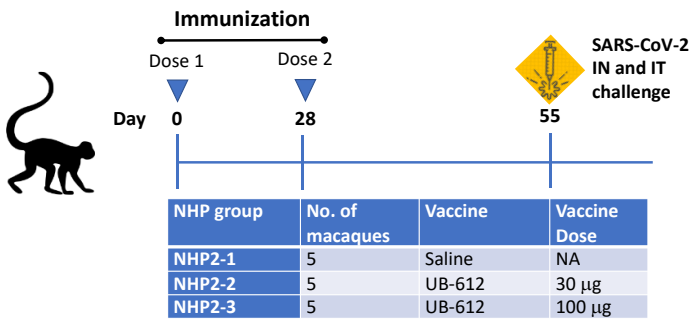

**B**

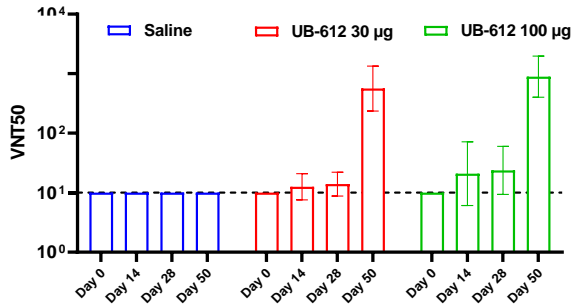

**C**

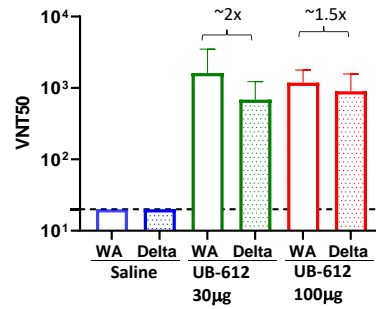

**D**

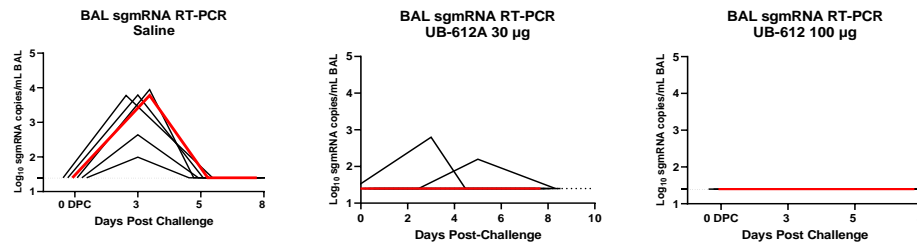

**E**

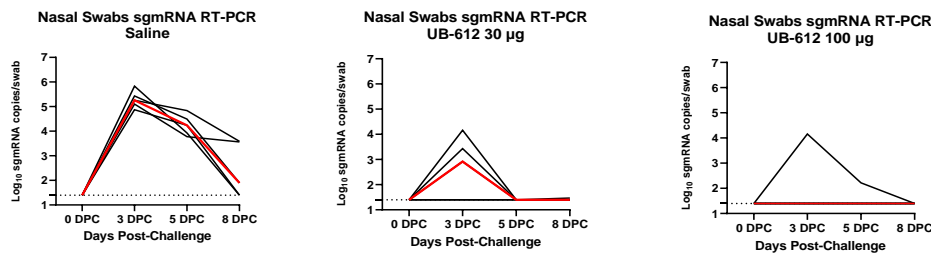

**F**

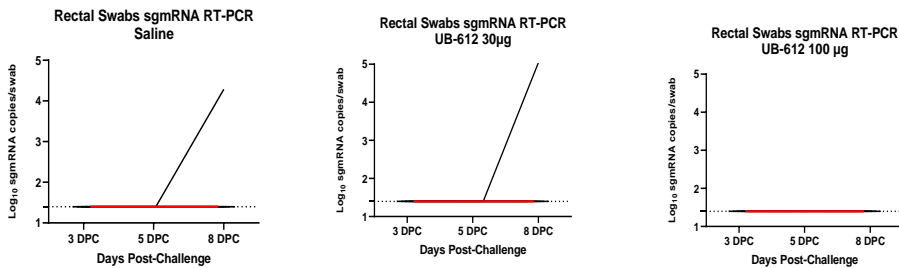

**Fig 8. Neutralizing antibody response and protective immunity in cynomolgus macaques**

**(Study 2).** The macaques received Saline, UB-612 30 µg or UB-612 100 µg on Day 0 and Day 28, and were challenged with SARS-CoV-2 virus on Day 55.

- (A) The immunization and challenge study design in rhesus macaques (Study 2). SARS-CoV-2 Wuhan strain was used for challenge on Day 55 with a total of  $1.0 \times 10^5$  TCID<sub>50</sub> of SARS-CoV-2 divided equally between intranasal (IN,  $0.5 \times 10^5$  TCID<sub>50</sub>) and intratracheal (IT,  $0.5 \times 10^5$  TCID<sub>50</sub>) administration.
- (B) Neutralizing antibody responses against wild type Wuhan (WA) strain at different time points.
- (C) Neutralizing antibody tiers against WA and Delta variant on Day 50 (3 weeks after the second immunization).
- (D-F) Viral loads were detected in (D) BAL, (E) nasal swabs and (F) rectal swabs through sgRNA RT-PCR after challenge with SARS-CoV-2 Wuhan strain. The black curves represent viral loads of the individual animals, and the red curves are the median viral load of each group.
